# Supplementary material for: Cognitive performance in distinct groups of children undergoing epilepsy surgery—a single-centre experience
Source: PeerJ. 2019 Oct 8;7:e7790. doi: 10.7717/peerj.7790 (PMC6788437; doi:10.7717/peerj.7790)
Supplement: Supplemental Information 2 — TLE: temporal lobe epilepsy, XTLE: extratemporal lobe epilepsy, HEMI: hemispheric epilepsy, FCD: focal cortical dysplasia, MCD: malformations of cortical development, TSC: tuberous sclerosis complex, FBTCS: focal to bilateral tonic clonic seizure, LEAT: long-term epilepsy-associated tumours [file peerj-07-7790-s002.xlsx]

## Sheet: table_for_PeerJ
patient_id	sex	FA	prenatal_risks	febrile_seizures	trauma	inflammation	age_at_first_seizure	infantile_spasms	epi_syndrom	seizure_occurence	status_epilepticus	FBTCS	abnormal_neurological_finding	neuropsychology_presurgical	method1	neuropsychology_postsurgical	method2	neuropsychology_change	MRI_finding	FDG_PET	interictal_SPECT	ictal_SPECT	SISCOM	MRS	fMRI	DTI	WADA	EcoG_performed	EcoG_after_resection	iEEG_performed	iEEG_electrode_type	date_of_surgery	age_at_surgery	duration_of_epilepsy_at_surgery	surgery_type	surgery_extent	surgery_localization	IOM	awake	MST	VNS	completeness	histopathology	FCD_class	FU2Y	early_postsurgical_seizures	complication_course1	complication_course2	complication_type
3592	female	no	no	no	no	no	0	yes	XTLE	Daily	yes	no	yes	NaN	NA	52	DQ	NaN	Lesional	not_performed	not_performed	not_performed	no	not_performed	no	no	no	performed	not_performed	not_performed	NA	08/01/2000	0.35	0.35	Tailored_resection	Multilobar_resection	right	no	no	no	no	no	MCD	FCD2B	Engel I	no	No_complication	No_complication	<undefined>
3126	female	no	no	no	no	no	6	no	TLE	Less_than_monthly	no	yes	no	68	SB.IV	64	SB.IV	-4	Lesional	performed	not_performed	not_performed	no	performed	no	no	no	performed	not_performed	not_performed	NA	01/15/2002	16.5	10.5	Standardized_resection	Unilobar_resection	left	no	no	no	no	yes	HS	FCD3A	Engel I	no	No_complication	No_complication	<undefined>
2696	female	no	no	yes	no	no	8	no	TLE	Monthly	no	yes	no	71	WAISIII	67	SB.IV	-4	Lesional	performed	not_performed	not_performed	no	performed	no	no	yes	performed	performed	not_performed	NA	04/10/2002	16.8	8.8	Standardized_resection	Unilobar_resection	left	no	no	no	no	no	HS	<undefined>	Engel I	yes	No_complication	No_complication	<undefined>
2497	male	no	yes	yes	no	no	2	no	TLE	Daily	no	yes	no	77	WAISIII	95	WAISIII	18	Lesional	performed	not_performed	not_performed	no	performed	no	no	yes	not_performed	not_performed	not_performed	NA	05/22/2002	18	16	Standardized_resection	Unilobar_resection	left	no	no	no	no	yes	HS	<undefined>	Engel I	no	No_complication	No_complication	<undefined>
2503	male	no	no	no	no	no	8.5	no	TLE	Less_than_monthly	no	no	yes	98	WISCIII	105	WISCIII	7	Lesional	performed	not_performed	not_performed	no	performed	yes	no	yes	performed	performed	not_performed	NA	12/17/2002	9.7	1.2	Extended_lesionectomy	Unilobar_resection	left	no	no	no	no	yes	tumour	FCD3B	Engel I	no	No_complication	No_complication	<undefined>
2460	male	no	no	no	no	no	11.8	no	XTLE	Daily	yes	yes	no	84	WISCIII	NaN	NA	NaN	Lesional	not_performed	performed	not_performed	no	performed	no	no	no	performed	not_performed	not_performed	NA	01/01/2003	14.8	2.9	Extended_lesionectomy	Focal_resection	left	no	no	no	no	yes	MCD	FCD2B	Engel I	yes	No_complication	No_complication	<undefined>
3776	female	no	no	no	yes	no	10	no	TLE	Weekly	no	yes	no	66	SB.IV	68	SB.IV	2	Lesional	not_performed	not_performed	not_performed	no	not_performed	no	no	no	performed	not_performed	not_performed	NA	01/07/2003	20.8	10.8	Standardized_resection	Unilobar_resection	left	no	no	no	no	no	HS	<undefined>	Engel I	no	complication_of_resection	No_complication	Minor
3112	male	no	no	no	no	no	3	no	TLE	Daily	no	no	no	102	WISCIII	98	WISCIII	-4	Lesional	not_performed	not_performed	not_performed	no	not_performed	no	no	no	not_performed	not_performed	not_performed	NA	01/13/2003	12.1	9.1	Lesionectomy	Unilobar_resection	right	no	no	no	no	yes	tumour	FCD3B	Engel I	no	No_complication	No_complication	<undefined>
3405	male	no	no	no	no	no	14	no	TLE	Less_than_monthly	no	no	no	120	WAISIII	123	WAISIII	3	Lesional	not_performed	not_performed	not_performed	no	not_performed	no	no	no	not_performed	not_performed	not_performed	NA	02/17/2003	16.9	2.9	Extended_lesionectomy	Unilobar_resection	right	no	no	no	no	yes	tumour	FCD3B	Engel I	no	No_complication	No_complication	<undefined>
2735	female	yes	no	no	no	no	2.5	no	TLE	Weekly	no	no	no	62	SB.IV	68	SB.IV	6	Lesional	performed	not_performed	not_performed	no	performed	no	no	yes	performed	not_performed	not_performed	NA	02/26/2003	15.4	12.9	Standardized_resection	Unilobar_resection	left	no	no	no	no	yes	HS	FCD3A	Engel I	no	No_complication	No_complication	<undefined>
3337	female	no	yes	no	no	no	7	no	XTLE	Daily	yes	yes	no	87	WISCIII	NaN	NA	NaN	Normal	performed	performed	performed	no	performed	yes	no	no	performed	not_performed	performed	Subdural	04/14/2003	14.3	7.3	Tailored_resection	Focal_resection	left	no	no	no	no	no	MCD	FCD2B	Engel II	yes	No_complication	No_complication	<undefined>
2831	female	no	no	yes	no	yes	5.3	no	TLE	Daily	no	no	no	90	WISCIII	92	WISCIII	2	Lesional	performed	not_performed	not_performed	no	performed	no	no	yes	performed	performed	not_performed	NA	04/30/2003	9.1	3.8	Standardized_resection	Unilobar_resection	left	no	no	no	no	no	HS	FCD3A	Engel I	no	No_complication	No_complication	<undefined>
2794	female	no	no	no	no	no	13	no	XTLE	Monthly	no	yes	no	90	WAISIII	NaN	NA	NaN	Lesional	performed	not_performed	not_performed	no	performed	yes	no	no	performed	not_performed	not_performed	NA	06/10/2003	16.7	3.7	Extended_lesionectomy	Focal_resection	left	no	no	no	no	yes	tumour	<undefined>	Engel I	no	No_complication	No_complication	<undefined>
2746	male	yes	no	yes	no	no	1.5	no	TLE	Daily	no	yes	no	109	WISCIII	88	WISCIII	-21	Lesional	performed	not_performed	performed	no	performed	no	no	yes	performed	not_performed	not_performed	NA	06/17/2003	9.5	8	Standardized_resection	Unilobar_resection	right	no	no	no	no	no	HS	<undefined>	Engel I	no	No_complication	No_complication	<undefined>
2939	male	no	no	no	no	no	4	no	TLE	Daily	no	yes	no	72	WISCIII	79	WISCIII	7	Lesional	performed	performed	performed	no	performed	yes	no	yes	not_performed	not_performed	performed	Intracerebral_Subdural	06/18/2003	12.8	8.8	Standardized_resection	Unilobar_resection	left	no	no	no	no	yes	HS	FCD3A	Engel I	no	No_complication	No_complication	<undefined>
2979	male	no	no	yes	no	no	3	no	TLE	Less_than_monthly	no	yes	no	69	SB.IV	78	WISCIII	9	Lesional	performed	not_performed	not_performed	no	performed	no	no	yes	performed	performed	not_performed	NA	06/28/2003	11.6	8.6	Standardized_resection	Unilobar_resection	left	no	no	no	no	yes	HS	FCD3A	Engel II	no	No_complication	No_complication	<undefined>
3266	female	no	no	yes	no	no	12	no	TLE	Less_than_monthly	no	no	no	102	WAISIII	97	WAISIII	-5	Lesional	performed	not_performed	not_performed	no	performed	no	no	yes	performed	performed	not_performed	NA	08/21/2003	19.6	7.6	Standardized_resection	Unilobar_resection	right	no	no	no	no	yes	HS	<undefined>	Engel I	no	No_complication	No_complication	<undefined>
3241	male	no	no	yes	no	no	1.9	no	TLE	Less_than_monthly	no	no	no	57	SB.IV	75	WAISIII	18	Lesional	performed	not_performed	not_performed	no	performed	yes	no	no	performed	not_performed	not_performed	NA	10/02/2003	16.6	14.7	Standardized_resection	Unilobar_resection	right	no	no	no	no	yes	HS	FCD3A	Engel I	no	No_complication	No_complication	<undefined>
3407	male	no	no	no	no	no	15	no	TLE	Less_than_monthly	no	no	no	113	WAISIII	114	WAISIII	1	Lesional	not_performed	not_performed	not_performed	no	performed	yes	no	no	performed	not_performed	not_performed	NA	10/20/2003	18.5	3.5	Lesionectomy	Focal_resection	left	no	no	no	no	yes	tumour	FCD3B	Engel I	no	No_complication	No_complication	<undefined>
2561	female	no	no	no	no	yes	3.5	no	XTLE	Daily	yes	yes	yes	64	SB.IV	72	WISCIII	8	Lesional	performed	performed	performed	no	performed	yes	no	no	not_performed	not_performed	performed	Subdural	01/26/2004	11	7.5	Extended_lesionectomy	Unilobar_resection	left	no	no	no	no	yes	glial scar	<undefined>	Engel I	no	No_complication	No_complication	Major
3279	male	no	no	no	no	no	10	no	TLE	Daily	no	no	no	56	SB.IV	66	SB.IV	10	Lesional	performed	not_performed	performed	no	performed	yes	no	no	performed	not_performed	not_performed	NA	02/24/2004	14	4	Standardized_resection	Unilobar_resection	right	no	no	no	no	yes	TSC	<undefined>	Engel I	no	No_complication	No_complication	<undefined>
2456	male	no	yes	no	no	no	5	no	TLE	Less_than_monthly	no	no	no	98	WISCIII	101	WISCIII	3	Lesional	performed	not_performed	not_performed	no	performed	yes	no	no	performed	not_performed	not_performed	NA	03/17/2004	9.2	4.2	Extended_lesionectomy	Unilobar_resection	left	no	no	no	no	yes	tumour	FCD3B	Engel I	no	No_complication	No_complication	<undefined>
3271	female	no	yes	no	no	no	4.2	no	XTLE	Daily	no	no	no	96	WISCIII	98	WISCIII	2	Lesional	not_performed	performed	performed	no	performed	yes	no	no	not_performed	not_performed	performed	Subdural	05/26/2004	8.6	4.4	Extended_lesionectomy	Focal_resection	left	no	no	no	no	yes	MCD	FCD2B	Engel I	no	No_complication	No_complication	<undefined>
3234	male	yes	no	no	no	no	3.5	no	XTLE	Daily	no	yes	no	97	WISCIII	94	WISCIII	-3	Normal	performed	performed	performed	no	performed	yes	no	no	not_performed	not_performed	performed	Subdural	06/21/2004	7.6	4.1	Tailored_resection	Focal_resection	right	no	no	no	no	yes	MCD	FCD2B	Engel I	no	No_complication	No_complication	<undefined>
3242	female	yes	no	no	no	no	6	no	XTLE	Less_than_monthly	yes	yes	no	76	WAISIII	69	SB.IV	-7	Lesional	performed	performed	not_performed	no	performed	yes	no	no	performed	not_performed	not_performed	NA	10/20/2004	18	12	Extended_lesionectomy	Focal_resection	right	no	no	no	no	yes	tumour	FCD3B	Engel I	no	No_complication	No_complication	<undefined>
3338	female	no	no	no	no	no	13.8	no	TLE	Daily	no	yes	no	75	WAISIII	89	WAISIII	14	Normal	performed	performed	performed	no	performed	no	no	yes	performed	performed	performed	Intracerebral_Subdural	12/15/2004	17.1	3.3	Tailored_resection	Unilobar_resection	left	no	no	yes	no	no	MCD	FCD1	Engel IV	no	No_complication	No_complication	<undefined>
2334	female	no	yes	no	no	no	4.8	no	XTLE	Daily	no	no	no	88	WISCIII	91	WISCIII	3	Lesional	performed	performed	performed	no	performed	no	no	no	performed	performed	performed	Subdural	06/14/2005	8.1	3.3	Tailored_resection	Unilobar_resection	right	no	no	no	no	yes	MCD	FCD2B	Engel I	no	No_complication	No_complication	<undefined>
2455	male	yes	yes	no	no	no	0	no	XTLE	Daily	no	no	yes	48	DQ	35	SB.IV	-13	Lesional	not_performed	not_performed	not_performed	no	not_performed	no	no	no	performed	performed	not_performed	NA	09/07/2005	3	3	Tailored_resection	Unilobar_resection	right	no	no	no	no	no	MCD	FCD2B	Engel II	no	No_complication	No_complication	<undefined>
2412	female	no	no	no	yes	no	9.5	no	XTLE	Daily	yes	no	yes	90	WISCIII	92	WISCIII	2	Lesional	performed	performed	performed	no	performed	yes	no	no	performed	performed	performed	Intracerebral_Subdural	10/20/2005	14.3	4.8	Tailored_resection	Multilobar_resection	right	no	no	no	no	yes	encephalitis	<undefined>	NA	<undefined>	complication_of_resection	No_complication	Major
2404	male	yes	no	no	no	no	0	yes	XTLE	Daily	yes	no	yes	36	DQ	25	DQ	-11	Lesional	not_performed	not_performed	not_performed	no	not_performed	no	no	no	performed	not_performed	not_performed	NA	02/23/2006	0.3	0.3	Tailored_resection	Multilobar_resection	right	no	no	no	no	yes	TSC	<undefined>	Engel I	no	complication_of_resection	No_complication	Minor
2015	male	no	yes	no	no	no	0.5	no	TLE	Daily	no	yes	yes	91	WISCIII	87	WISCIII	-4	Lesional	performed	performed	performed	no	performed	yes	yes	yes	performed	performed	performed	Intracerebral_Subdural	04/04/2006	7.9	7.4	Tailored_resection	Unilobar_resection	left	no	no	no	no	yes	MCD	FCD2B	Engel I	no	No_complication	No_complication	<undefined>
1935	male	no	no	no	no	no	7.5	no	TLE	Monthly	no	no	yes	110	WISCIII	115	WISCIII	5	Lesional	not_performed	not_performed	not_performed	no	performed	no	no	yes	performed	not_performed	not_performed	NA	05/23/2006	8.5	1	Extended_lesionectomy	Unilobar_resection	left	no	no	no	no	yes	tumour	FCD3B	Engel I	no	No_complication	No_complication	<undefined>
2024	male	no	no	no	yes	no	11.7	no	XTLE	Daily	no	no	yes	72	WISCIII	77	WISCIII	5	Lesional	not_performed	performed	performed	no	not_performed	yes	no	no	performed	performed	not_performed	NA	06/06/2006	14.1	2.4	Tailored_resection	Focal_resection	left	no	no	no	no	no	glial scar	<undefined>	Engel I	no	No_complication	No_complication	<undefined>
2212	male	no	no	no	no	no	11	no	XTLE	Less_than_monthly	no	yes	no	92	WAISIII	87	WAISIII	-5	Lesional	performed	performed	performed	no	performed	no	no	yes	performed	performed	performed	Intracerebral_Subdural	10/13/2006	19.2	8.2	Tailored_resection	Multilobar_resection	right	no	no	no	no	yes	glial scar	<undefined>	Engel I	no	No_complication	No_complication	<undefined>
2126	female	no	no	no	no	no	1.2	no	XTLE	Daily	no	no	yes	61	SB.IV	61	SB.IV	0	Lesional	performed	not_performed	not_performed	no	not_performed	no	no	no	performed	performed	not_performed	NA	10/18/2006	3.1	1.9	Extended_lesionectomy	Multilobar_resection	left	no	no	no	no	no	tumour	<undefined>	Engel I	no	No_complication	No_complication	<undefined>
2293	male	no	no	no	no	no	14.8	no	TLE	Monthly	no	no	no	105	WISCIII	112	WAISIII	7	Lesional	performed	not_performed	not_performed	no	not_performed	no	no	yes	performed	performed	not_performed	NA	06/19/2007	16	1.1	Tailored_resection	Unilobar_resection	right	no	no	no	no	yes	tumour	FCD3B	Engel I	no	complication_of_resection	No_complication	Major
2105	female	no	no	no	no	no	14.6	no	TLE	Monthly	no	yes	yes	80	WAISIII	NaN	NA	NaN	Lesional	not_performed	not_performed	not_performed	no	not_performed	yes	no	no	performed	not_performed	not_performed	NA	06/26/2007	16	1.4	Lesionectomy	Focal_resection	left	no	yes	no	no	yes	tumour	<undefined>	Engel I	no	No_complication	No_complication	<undefined>
2356	male	yes	no	no	no	no	0.7	no	TLE	Daily	no	no	no	NaN	NA	63	SB.IV	NaN	Lesional	performed	performed	performed	yes	not_performed	no	no	no	performed	performed	not_performed	NA	08/09/2007	14.7	14	Tailored_resection	Multilobar_resection	right	no	no	no	no	yes	MCD	FCD2B	Engel I	no	complication_of_resection	No_complication	Minor
2089	female	no	no	no	no	no	0.5	no	XTLE	Daily	no	yes	yes	73	WAISIII	88	WAISIII	15	Lesional	performed	performed	performed	yes	performed	no	no	no	performed	performed	performed	Subdural	09/25/2007	19.2	18.7	Tailored_resection	Multilobar_resection	right	no	no	no	no	yes	TSC	<undefined>	Engel I	no	No_complication	No_complication	<undefined>
2093	female	yes	no	no	no	no	0.3	yes	XTLE	Daily	no	yes	yes	65	SB.IV	81	SB.IV	16	Lesional	performed	performed	performed	no	performed	no	yes	no	not_performed	not_performed	performed	Intracerebral_Subdural	12/18/2007	3.2	3	Tailored_resection	Focal_resection	left	no	no	no	no	yes	TSC	<undefined>	Engel I	no	No_complication	No_complication	<undefined>
2303	female	no	no	no	no	no	5.8	no	XTLE	Daily	no	no	no	98	WISCIII	101	WISCIII	3	Lesional	performed	not_performed	not_performed	no	performed	no	no	no	performed	not_performed	not_performed	NA	02/25/2008	7.7	1.9	Lesionectomy	Focal_resection	right	no	no	no	no	yes	MCD	FCD1	Engel II	no	No_complication	No_complication	<undefined>
2320	female	no	yes	no	no	no	0.5	no	XTLE	Daily	no	no	yes	89	DQ	86	SB.IV	-3	Lesional	not_performed	performed	performed	yes	not_performed	no	no	no	not_performed	performed	performed	Subdural	03/11/2008	2.8	2.3	Tailored_resection	Unilobar_resection	left	no	no	no	no	no	TSC	<undefined>	Engel I	yes	complication_of_resection	complication_of_invasive_monitoring	Minor
3399	female	no	no	no	no	no	1.2	no	TLE	Less_than_monthly	yes	yes	yes	48	SB.IV	48	SB.IV	0	Lesional	performed	performed	performed	yes	performed	no	no	yes	performed	not_performed	not_performed	NA	06/12/2008	19.2	18	Standardized_resection	Unilobar_resection	left	no	no	no	no	yes	HS	<undefined>	Engel I	no	No_complication	No_complication	<undefined>
2122	female	yes	no	no	no	no	3.5	no	XTLE	Daily	no	no	no	80	WISCIII	77	WISCIII	-3	Lesional	performed	performed	performed	no	performed	yes	yes	no	performed	performed	not_performed	NA	07/15/2008	10.1	6.6	Tailored_resection	Focal_resection	left	no	yes	no	no	yes	MCD	FCD2B	Engel I	no	No_complication	No_complication	<undefined>
3593	female	no	no	no	no	no	1.1	no	TLE	Daily	yes	yes	no	75	WAISIII	NaN	NA	NaN	Lesional	performed	not_performed	not_performed	no	performed	no	no	no	performed	performed	not_performed	NA	08/19/2008	20	19	Standardized_resection	Unilobar_resection	right	no	no	no	no	yes	HS	FCD3A	Engel I	no	No_complication	No_complication	<undefined>
3656	female	no	no	no	no	no	1.7	no	TLE	Weekly	no	no	yes	67	SB.IV	69	SB.IV	2	Lesional	performed	performed	performed	yes	performed	yes	yes	no	performed	performed	performed	Subdural	09/16/2008	12.4	10.7	Tailored_resection	Unilobar_resection	left	no	no	no	no	yes	tumour	FCD3B	Engel I	no	No_complication	No_complication	<undefined>
3410	male	no	no	no	no	no	1.2	no	XTLE	Daily	yes	yes	no	52	SB.IV	58	SB.IV	6	Lesional	performed	performed	performed	yes	performed	no	no	no	performed	performed	not_performed	NA	09/18/2008	7	5.9	Tailored_resection	Unilobar_resection	right	no	no	no	no	yes	TSC	<undefined>	Engel I	no	complication_of_resection	No_complication	Minor
3392	male	no	yes	no	no	no	0	no	XTLE	Less_than_monthly	no	no	yes	60	DQ	63	SB.IV	3	Lesional	performed	not_performed	not_performed	no	not_performed	no	no	no	performed	performed	not_performed	NA	10/01/2008	2.6	2.6	Tailored_resection	Multilobar_resection	right	no	no	no	no	no	MCD	unspecified_MCD	Engel I	no	No_complication	No_complication	<undefined>
3411	male	no	no	no	no	no	13.9	no	XTLE	Daily	no	no	no	88	WAISIII	96	WAISIII	8	Normal	performed	performed	performed	yes	performed	no	no	no	not_performed	not_performed	performed	Intracerebral_Subdural	11/18/2008	17.7	3.8	Tailored_resection	Focal_resection	right	no	no	no	no	yes	MCD	FCD1	Engel I	no	No_complication	No_complication	<undefined>
3409	male	no	no	yes	no	no	5	no	TLE	Lesst_than_monthly	no	yes	yes	108	WAISIII	124	WAISIII	16	Lesional	performed	not_performed	not_performed	no	performed	no	no	yes	performed	not_performed	not_performed	NA	02/03/2009	18.9	13.9	Standardized_resection	Unilobar_resection	left	no	no	no	no	yes	HS	FCD3A	Engel I	no	No_complication	No_complication	<undefined>
2002	female	no	no	no	no	no	0.3	yes	HEMI	Daily	no	no	yes	34	SB.IV	61	SB.IV	27	Lesional	not_performed	not_performed	not_performed	no	not_performed	no	no	no	not_performed	not_performed	not_performed	NA	02/19/2009	3.3	3	Hemisferectomy	Hemisferectomy	left	no	no	no	no	yes	MCD	FCD2B	Engel I	no	No_complication	No_complication	<undefined>
3067	male	no	no	no	no	no	0.7	no	XTLE	Daily	no	yes	yes	72	WISCIII	63	SB.IV	-9	Lesional	not_performed	performed	performed	yes	not_performed	yes	yes	no	performed	performed	not_performed	NA	04/16/2009	9.9	9.3	Tailored_resection	Multilobar_resection	right	no	no	no	yes	yes	MCD	FCD2B	Engel IV	yes	complication_of_resection	No_complication	Minor
3786	female	no	no	yes	no	no	10	no	TLE	Weekly	no	yes	no	88	WAISIII	87	WAISIII	-1	Lesional	performed	not_performed	not_performed	no	not_performed	no	no	no	performed	not_performed	not_performed	NA	06/11/2009	18.2	8.2	Standardized_resection	Unilobar_resection	right	no	no	no	no	yes	HS	<undefined>	Engel I	no	No_complication	No_complication	<undefined>
3594	male	no	no	no	no	no	0.7	no	TLE	Less_than_monthly	no	no	yes	64	SB.IV	NaN	NA	NaN	Lesional	performed	not_performed	not_performed	no	performed	no	no	yes	performed	not_performed	not_performed	NA	09/17/2009	12.4	11.7	Standardized_resection	Unilobar_resection	left	no	no	no	no	yes	HS	FCD3A	Engel I	no	No_complication	No_complication	<undefined>
3595	male	no	no	no	no	no	8.8	no	XTLE	Daily	no	yes	yes	102	WISCIII	112	WISCIII	10	Lesional	performed	performed	performed	no	performed	yes	no	no	performed	performed	performed	Subdural	10/06/2009	10.1	1.4	Tailored_resection	Focal_resection	right	no	no	no	no	no	MCD	FCD1	Engel IV	yes	No_complication	No_complication	<undefined>
3581	male	no	no	no	yes	no	5.9	no	XTLE	Less_than_monthly	no	no	yes	94	WAISIII	87	WAISIII	-7	Lesional	not_performed	performed	performed	yes	not_performed	yes	no	no	performed	performed	not_performed	NA	10/19/2009	17.1	11.2	Tailored_resection	Unilobar_resection	right	no	no	no	no	no	glial scar	<undefined>	Engel I	no	No_complication	No_complication	<undefined>
3590	female	no	yes	yes	no	no	4	no	TLE	Less_than_monthly	no	yes	no	88	WAISIII	NaN	NA	NaN	Lesional	performed	not_performed	not_performed	no	performed	no	no	yes	performed	not_performed	not_performed	NA	10/27/2009	18.2	14.2	Standardized_resection	Unilobar_resection	left	no	no	no	no	yes	HS	FCD3A	Engel I	no	No_complication	No_complication	<undefined>
3749	female	no	no	no	no	no	0.8	no	XTLE	Daily	no	yes	no	67	SB.IV	50	SB.IV	-17	Normal	performed	performed	performed	yes	performed	no	no	no	performed	performed	performed	Subdural	11/10/2009	11.6	10.9	Tailored_resection	Focal_resection	right	no	no	no	yes	no	MCD	FCD1	Engel IV	yes	No_complication	No_complication	<undefined>
3633	female	no	no	no	no	no	1	no	HEMI	Daily	yes	yes	yes	70	SB.IV	84	SB.IV	14	Lesional	performed	not_performed	not_performed	no	not_performed	no	no	no	not_performed	not_performed	not_performed	NA	12/23/2009	3.3	2.3	Hemisferectomy	Hemisferectomy	left	no	no	no	no	yes	MCD	unspecified_MCD	Engel I	no	No_complication	No_complication	<undefined>
3631	female	no	no	no	no	no	3.8	no	XTLE	Daily	no	no	no	88	WISCIII	101	WISCIII	13	Lesional	performed	performed	performed	yes	performed	yes	no	no	performed	not_performed	not_performed	NA	01/12/2010	6.3	2.6	Tailored_resection	Focal_resection	right	no	no	no	no	yes	MCD	FCD2B	Engel I	no	No_complication	No_complication	<undefined>
3589	female	no	no	no	no	no	1.5	no	TLE	Daily	no	yes	no	70	WISCIII	66	SB.IV	-4	Lesional	performed	performed	not_performed	no	performed	yes	yes	no	performed	performed	performed	Intracerebral_Subdural	01/26/2010	10.9	9.4	Tailored_resection	Unilobar_resection	left	no	no	no	no	yes	tumour	FCD3B	Engel I	no	No_complication	No_complication	<undefined>
3560	male	no	no	no	no	no	11	no	XTLE	Daily	no	yes	no	103	WISCIII	NaN	NA	NaN	Lesional	not_performed	not_performed	not_performed	no	performed	yes	yes	no	performed	not_performed	performed	NA	02/09/2010	14.2	3.2	Lesionectomy	Focal_resection	left	yes	no	no	no	yes	tumour	<undefined>	Engel I	no	No_complication	No_complication	<undefined>
3630	female	no	no	no	no	no	0.8	no	TLE	Daily	no	no	no	NaN	NA	NaN	NA	NaN	Lesional	performed	performed	performed	yes	performed	no	no	no	performed	not_performed	not_performed	NA	02/11/2010	10.8	10	Standardized_resection	Unilobar_resection	right	no	no	no	no	yes	HS	FCD3A	Engel I	no	No_complication	No_complication	<undefined>
3596	male	no	no	no	no	no	6.8	no	XTLE	Daily	no	no	yes	58	SB.IV	87	WISCIII	29	Lesional	not_performed	performed	performed	yes	not_performed	yes	no	no	performed	not_performed	not_performed	NA	03/02/2010	12.1	5.2	Tailored_resection	Unilobar_resection	right	yes	no	no	no	no	glial scar	<undefined>	Engel II	no	complication_of_resection	No_complication	Major
3401	male	no	yes	no	no	no	0.4	no	XTLE	Daily	no	no	yes	73	SB.IV	91	SB.IV	18	Lesional	performed	performed	performed	no	performed	no	yes	no	performed	performed	performed	Subdural	05/18/2010	4.6	4.1	Tailored_resection	Focal_resection	right	yes	no	no	no	yes	MCD	FCD2B	Engel I	no	No_complication	No_complication	<undefined>
3602	male	no	no	no	no	no	11.5	no	XTLE	Monthly	no	yes	no	79	WISCIII	NaN	NA	NaN	Lesional	performed	performed	performed	yes	performed	yes	yes	no	performed	performed	not_performed	NA	05/25/2010	15.7	4.2	Tailored_resection	Multilobar_resection	left	yes	no	no	no	yes	glial scar	<undefined>	Engel I	no	No_complication	No_complication	<undefined>
3639	male	no	no	no	no	no	12.4	no	XTLE	Daily	no	yes	no	100	WAISIII	103	WAISIII	3	Lesional	performed	not_performed	not_performed	no	performed	yes	yes	no	performed	not_performed	not_performed	NA	06/01/2010	16	3.6	Extended_lesionectomy	Focal_resection	left	yes	no	no	no	yes	tumour	<undefined>	Engel I	no	No_complication	No_complication	<undefined>
3601	male	no	no	no	no	no	13	no	TLE	Monthly	no	yes	no	112	WAISIII	121	WAISIII	9	Lesional	performed	not_performed	not_performed	no	performed	no	no	no	performed	performed	not_performed	NA	06/08/2010	19.9	6.9	Standardized_resection	Unilobar_resection	right	no	no	no	no	yes	HS	<undefined>	Engel I	no	No_complication	No_complication	<undefined>
3609	female	no	no	no	no	yes	17.5	no	TLE	Less_than_monthly	no	yes	no	92	WAISIII	111	WAISIII	19	Lesional	performed	not_performed	not_performed	no	performed	no	no	no	performed	performed	not_performed	NA	08/31/2010	18.5	1	Extended_lesionectomy	Unilobar_resection	right	no	no	no	no	yes	tumour	FCD3B	Engel I	no	No_complication	No_complication	<undefined>
3637	female	no	no	no	no	no	0.5	no	TLE	Less_than_monthly	no	no	no	97	WAISIII	NaN	NA	NaN	Lesional	performed	not_performed	not_performed	no	not_performed	no	no	no	performed	not_performed	not_performed	NA	09/02/2010	17.3	16.8	Extended_lesionectomy	Unilobar_resection	right	no	no	no	no	no	<undefined>	<undefined>	Engel I	no	No_complication	No_complication	<undefined>
3638	male	no	no	no	no	no	0.3	no	XTLE	Daily	no	yes	no	70	WISCIII	69	SB.IV	-1	Lesional	not_performed	not_performed	not_performed	no	not_performed	no	no	no	performed	performed	performed	NA	09/14/2010	8.7	8.4	Lesionectomy	Focal_resection	middle	no	no	no	no	no	hypothalamic_hamartoma	<undefined>	Engel II	yes	No_complication	No_complication	<undefined>
3636	female	no	no	no	no	no	0.8	yes	XTLE	Daily	no	no	yes	61	SB.IV	63	SB.IV	2	Lesional	performed	performed	performed	yes	not_performed	no	no	no	performed	performed	not_performed	NA	09/21/2010	4.8	4	Tailored_resection	Multilobar_resection	right	yes	no	no	no	yes	MCD	FCD1	Engel I	no	No_complication	No_complication	<undefined>
3659	female	no	no	no	no	no	6.4	no	TLE	Daily	no	yes	no	112	WISCIII	82	WISCIII	-30	Lesional	performed	performed	performed	yes	performed	no	no	no	performed	performed	performed	Subdural	10/13/2010	10.5	4.1	Tailored_resection	Multilobar_resection	right	no	no	no	no	no	MCD	FCD1	Engel I	no	No_complication	No_complication	<undefined>
3597	female	no	no	no	no	no	0.2	no	TLE	Daily	no	no	no	98	SB.IV	92	SB.IV	-6	Lesional	performed	not_performed	not_performed	no	performed	no	no	no	performed	not_performed	not_performed	NA	11/11/2010	3.1	2.9	Extended_lesionectomy	Focal_resection	right	yes	no	no	no	yes	MCD	FCD2B	Engel I	no	No_complication	No_complication	<undefined>
3657	female	yes	no	no	no	no	9	no	TLE	Daily	no	yes	no	100	WAISIII	105	WAISIII	5	Lesional	performed	not_performed	not_performed	no	performed	yes	yes	no	performed	performed	not_performed	NA	11/16/2010	17.8	8.8	Lesionectomy	Focal_resection	left	yes	no	no	no	yes	tumour	FCD3B	Engel I	no	No_complication	No_complication	<undefined>
3660	male	no	no	yes	no	no	2.9	no	XTLE	Less_than_monthly	no	no	no	109	SB.IV	112	SB.IV	3	Lesional	not_performed	not_performed	not_performed	no	not_performed	no	no	no	performed	not_performed	not_performed	NA	11/22/2010	3.7	0.8	Extended_lesionectomy	Focal_resection	right	no	no	no	no	yes	tumour	FCD3B	Engel I	no	No_complication	No_complication	<undefined>
3661	female	no	no	yes	no	no	5	no	TLE	Weekly	no	yes	no	119	WAISIII	117	WAISIII	-2	Lesional	performed	not_performed	not_performed	no	performed	no	no	no	performed	not_performed	not_performed	NA	11/23/2010	20.5	15.5	Standardized_resection	Unilobar_resection	left	no	no	no	no	yes	HS	<undefined>	Engel I	no	No_complication	No_complication	<undefined>
3658	male	no	no	no	no	no	2.5	no	XTLE	Daily	no	no	yes	93	DQ	107	SB.IV	14	Lesional	not_performed	not_performed	not_performed	no	performed	no	yes	no	performed	performed	not_performed	NA	12/16/2010	2.7	0.2	Extended_lesionectomy	Focal_resection	left	yes	no	no	no	yes	tumour	<undefined>	Engel I	no	No_complication	No_complication	<undefined>
3669	female	yes	no	yes	no	no	1.5	no	TLE	Weekly	no	no	no	68	SB.IV	78	WAISIII	10	Lesional	performed	not_performed	not_performed	no	performed	no	no	yes	performed	performed	not_performed	NA	01/04/2011	16	14.5	Standardized_resection	Unilobar_resection	left	no	no	no	no	yes	HS	FCD3A	Engel III	no	No_complication	No_complication	<undefined>
3664	male	yes	no	no	no	no	3.5	no	TLE	Weekly	no	yes	no	73	WISCIII	NaN	NA	NaN	Lesional	performed	not_performed	not_performed	no	performed	yes	yes	no	performed	not_performed	not_performed	NA	01/11/2011	11.3	7.8	Standardized_resection	Unilobar_resection	left	no	no	no	no	yes	tumour	FCD3B	Engel I	no	No_complication	No_complication	<undefined>
3600	female	no	no	no	no	no	1.2	no	XTLE	Daily	no	no	yes	63	SB.IV	63	SB.IV	0	Lesional	performed	performed	performed	yes	not_performed	no	no	no	performed	performed	not_performed	NA	01/27/2011	3.8	2.6	Tailored_resection	Multilobar_resection	left	yes	no	no	no	no	MCD	FCD1	Engel I	no	complication_of_resection	No_complication	Major
3629	female	no	no	no	no	no	1.5	no	XTLE	Daily	no	no	no	94	WISCIII	92	WISCIII	-2	Normal	performed	performed	performed	yes	performed	no	no	no	performed	performed	performed	Subdural	02/16/2011	9.2	7.7	Tailored_resection	Focal_resection	right	yes	no	no	no	yes	normal	<undefined>	Engel I	no	No_complication	No_complication	<undefined>
3693	male	no	no	no	no	no	7.4	no	TLE	Less_than_monthly	no	no	no	94	WISCIII	NaN	NA	NaN	Lesional	not_performed	not_performed	not_performed	no	performed	yes	no	no	performed	not_performed	not_performed	NA	03/08/2011	7.5	0.1	Extended_lesionectomy	Focal_resection	left	no	no	no	no	yes	tumour	<undefined>	Engel I	no	No_complication	No_complication	<undefined>
3670	male	no	yes	no	no	no	0.1	yes	XTLE	Daily	no	no	yes	64	SB.IV	84	WISCIII	20	Lesional	not_performed	not_performed	not_performed	no	not_performed	yes	yes	no	performed	performed	not_performed	NA	03/15/2011	10.9	10.8	Tailored_resection	Unilobar_resection	right	yes	no	no	no	no	glial scar	<undefined>	Engel III	no	No_complication	No_complication	<undefined>
3662	female	no	no	no	no	no	0	yes	XTLE	Daily	no	no	yes	68	DQ	62	DQ	-6	Lesional	not_performed	performed	performed	yes	not_performed	no	no	no	performed	not_performed	not_performed	NA	04/28/2011	1.9	1.9	Lesionectomy	Focal_resection	right	yes	no	no	no	yes	TSC	<undefined>	Engel I	no	complication_of_resection	No_complication	Major
3663	female	no	no	no	no	no	8.3	no	TLE	Weekly	no	yes	no	90	WISCIII	91	WISCIII	1	Lesional	performed	not_performed	not_performed	no	performed	yes	yes	no	performed	performed	not_performed	NA	05/31/2011	13.3	5	Standardized_resection	Unilobar_resection	left	no	no	no	no	yes	HS	FCD3A	Engel I	no	No_complication	No_complication	<undefined>
3667	female	yes	no	no	no	no	2	no	XTLE	Daily	no	no	yes	72	WISCIII	72	WISCIII	0	Lesional	performed	not_performed	not_performed	no	not_performed	no	yes	no	performed	performed	not_performed	NA	06/06/2011	6.8	4.8	Tailored_resection	Unilobar_resection	right	yes	no	no	no	yes	MCD	unspecified_MCD	Engel I	no	complication_of_resection	No_complication	Minor
3665	male	no	no	no	no	yes	0.5	no	TLE	Monthly	no	no	no	88	WAISIII	107	WAISIII	19	Lesional	performed	not_performed	not_performed	no	performed	yes	yes	yes	performed	performed	not_performed	NA	06/15/2011	18.8	18.3	Standardized_resection	Unilobar_resection	left	no	no	no	no	yes	HS	<undefined>	Engel I	yes	No_complication	No_complication	<undefined>
3676	male	no	no	no	no	no	0.2	yes	TLE	Daily	no	no	yes	81	DQ	61	SB.IV	-20	Lesional	not_performed	performed	performed	yes	not_performed	no	yes	no	performed	performed	not_performed	NA	09/27/2011	2.4	2.2	Lesionectomy	Focal_resection	left	yes	no	no	no	yes	TSC	<undefined>	Engel I	yes	No_complication	No_complication	<undefined>
3675	male	no	no	no	no	no	7.1	no	TLE	Daily	no	yes	no	107	WISCIII	105	WISCIII	-2	Lesional	not_performed	not_performed	not_performed	no	not_performed	yes	yes	no	performed	performed	not_performed	NA	09/29/2011	7.5	0.4	Extended_lesionectomy	Focal_resection	left	no	no	no	no	yes	tumour	<undefined>	Engel I	no	No_complication	No_complication	<undefined>
3677	male	no	no	no	no	no	0.1	yes	TLE	Daily	no	no	yes	58	DQ	48	DQ	-10	Lesional	not_performed	performed	performed	yes	not_performed	no	yes	no	performed	performed	not_performed	NA	10/04/2011	1.7	1.7	Tailored_resection	Multilobar_resection	left	yes	no	no	no	no	TSC	<undefined>	Engel II	no	No_complication	No_complication	<undefined>
3674	male	no	no	no	no	no	3.4	no	HEMI	Daily	no	yes	yes	55	SB.IV	72	WISCIII	17	Lesional	not_performed	not_performed	not_performed	no	not_performed	no	no	no	performed	not_performed	not_performed	NA	10/26/2011	6.2	2.8	Hemisferectomy	Hemisferectomy	right	no	no	no	no	no	MCD	unspecified_MCD	Engel I	no	complication_of_resection	No_complication	Minor
3678	male	no	no	no	no	no	0.4	yes	XTLE	Daily	no	no	yes	109	SB.IV	94	SB.IV	-15	Lesional	performed	performed	performed	yes	not_performed	no	no	no	performed	not_performed	performed	Intracerebral_Subdural	11/29/2011	4.8	4.4	Tailored_resection	Focal_resection	right	no	no	no	no	yes	TSC	<undefined>	Engel I	no	No_complication	No_complication	<undefined>
3691	female	no	no	no	no	no	1	no	XTLE	Daily	no	yes	no	74	WAISIII	89	WAISIII	15	Lesional	not_performed	performed	performed	yes	performed	yes	yes	no	performed	performed	not_performed	NA	01/05/2012	16.5	15.5	Tailored_resection	Focal_resection	right	yes	no	no	no	yes	TSC	<undefined>	Engel I	no	No_complication	No_complication	<undefined>
3705	male	yes	no	no	no	yes	2.8	no	XTLE	Daily	no	no	no	66	SB.IV	64	SB.IV	-2	Lesional	performed	performed	performed	yes	performed	no	no	no	performed	performed	performed	Intracerebral_Subdural	01/24/2012	11.9	9.1	Tailored_resection	Multilobar_resection	right	no	no	no	no	no	encephalitis	<undefined>	Engel IV	no	No_complication	No_complication	<undefined>
3695	female	no	no	no	no	no	6	no	TLE	Daily	no	no	no	101	WISCIII	109	WISCIII	8	Lesional	performed	not_performed	not_performed	no	not_performed	yes	yes	no	performed	performed	not_performed	NA	02/14/2012	10.1	4.1	Tailored_resection	Focal_resection	left	no	no	no	no	yes	tumour	<undefined>	Engel I	no	No_complication	No_complication	<undefined>
3700	female	no	no	yes	no	no	1.4	no	TLE	Daily	no	no	no	86	SB.IV	88	WISCIII	2	Lesional	performed	not_performed	not_performed	no	not_performed	no	no	no	performed	performed	not_performed	NA	02/16/2012	5.5	4.1	Standardized_resection	Unilobar_resection	left	no	no	no	no	yes	glial scar	<undefined>	Engel I	no	No_complication	No_complication	<undefined>
3701	male	no	no	no	no	no	5.6	no	XTLE	Daily	no	no	no	102	WISCIII	101	WISCIII	-1	Lesional	not_performed	not_performed	not_performed	no	not_performed	no	no	no	performed	not_performed	not_performed	NA	03/06/2012	13.7	8.1	Lesionectomy	Focal_resection	middle	no	no	no	no	no	hypothalamic_hamartoma	<undefined>	Engel I	no	No_complication	No_complication	<undefined>
3699	male	no	no	no	no	no	3.3	no	XTLE	Weekly	no	no	no	111	SB.IV	96	SB.IV	-15	Lesional	not_performed	not_performed	not_performed	no	not_performed	no	yes	no	performed	performed	not_performed	NA	05/28/2012	3.9	0.6	Extended_lesionectomy	Unilobar_resection	left	no	no	no	no	yes	tumour	<undefined>	Engel I	no	No_complication	No_complication	<undefined>
3703	male	yes	yes	no	no	no	6.2	no	XTLE	Daily	no	no	no	111	WISCIII	119	WISCIII	8	Lesional	not_performed	not_performed	not_performed	no	not_performed	yes	yes	no	performed	not_performed	not_performed	NA	06/28/2012	6.8	0.6	Extended_lesionectomy	Focal_resection	right	yes	no	no	no	yes	tumour	<undefined>	Engel I	no	No_complication	No_complication	<undefined>
3702	male	no	no	no	no	no	5.3	no	TLE	Daily	no	yes	no	98	WISCIII	105	WISCIII	7	Lesional	performed	not_performed	not_performed	no	not_performed	yes	yes	no	performed	performed	not_performed	NA	07/12/2012	7.7	2.5	Standardized_resection	Unilobar_resection	left	no	no	no	no	yes	tumour	FCD3B	Engel I	no	No_complication	No_complication	<undefined>
3704	female	no	no	no	no	no	9.8	no	TLE	Weekly	no	no	no	86	WISCIII	89	WISCIII	3	Lesional	performed	not_performed	not_performed	no	not_performed	yes	no	no	performed	performed	not_performed	NA	07/17/2012	14.3	4.5	Extended_lesionectomy	Focal_resection	left	no	no	no	no	yes	MCD	FCD2A	Engel I	no	No_complication	No_complication	<undefined>
3779	male	no	no	no	no	no	1.9	no	XTLE	Daily	yes	yes	no	103	DQ	105	DQ	2	Lesional	not_performed	not_performed	not_performed	no	not_performed	no	no	no	performed	not_performed	not_performed	NA	07/31/2012	2	0.1	Extended_lesionectomy	Focal_resection	right	no	no	no	no	yes	tumour	<undefined>	Engel I	no	No_complication	No_complication	<undefined>
3643	male	no	no	no	no	no	14.4	no	TLE	Weekly	no	no	no	89	WAISIII	87	WAISIII	-2	Lesional	performed	not_performed	not_performed	no	not_performed	no	no	no	performed	not_performed	not_performed	NA	09/26/2012	16.4	2	Extended_lesionectomy	Focal_resection	right	no	no	no	no	no	tumour	FCD3B	Engel I	no	No_complication	No_complication	<undefined>
3646	male	no	no	no	no	no	0.8	yes	TLE	Daily	no	no	no	74	SB.IV	91	SB.IV	17	Lesional	performed	not_performed	not_performed	no	not_performed	no	no	no	performed	not_performed	not_performed	NA	10/09/2012	4.2	3.5	Extended_lesionectomy	Multilobar_resection	left	no	no	no	no	yes	tumour	FCD3B	Engel I	no	No_complication	No_complication	<undefined>
3654	female	yes	no	no	no	no	15.9	no	XTLE	Less_than_monthly	no	yes	no	78	WAISIII	NaN	NA	NaN	Lesional	not_performed	not_performed	not_performed	no	not_performed	yes	yes	no	performed	not_performed	not_performed	NA	10/10/2012	16.2	0.3	Lesionectomy	Focal_resection	left	no	yes	no	no	yes	vascular_lesion	<undefined>	Engel I	no	No_complication	No_complication	<undefined>
3655	female	no	no	no	no	no	2.7	no	XTLE	Daily	no	yes	no	105	WAISIII	NaN	NA	NaN	Lesional	performed	performed	performed	yes	not_performed	yes	yes	no	performed	performed	performed	Intracerebral	11/06/2012	17.4	14.8	Tailored_resection	Unilobar_resection	right	yes	no	no	no	yes	MCD	FCD2B	Engel III	yes	No_complication	No_complication	<undefined>
3651	male	no	no	no	no	no	2.1	no	TLE	Weekly	no	yes	no	69	SB.IV	76	WISCIII	7	Lesional	performed	not_performed	not_performed	no	not_performed	yes	yes	no	performed	performed	not_performed	NA	11/08/2012	14.9	12.8	Tailored_resection	Focal_resection	left	no	no	no	no	yes	MCD	FCD2A	Engel I	no	No_complication	No_complication	<undefined>
3644	male	no	no	yes	no	no	5.9	no	TLE	Daily	no	yes	no	49	SB.IV	64	SB.IV	15	Lesional	performed	not_performed	not_performed	no	not_performed	yes	yes	no	performed	performed	not_performed	NA	11/27/2012	16.9	11	Standardized_resection	Unilobar_resection	left	no	no	no	no	no	HS	FCD3A	Engel I	no	No_complication	No_complication	<undefined>
3648	male	no	no	no	no	no	2.3	no	XTLE	Daily	no	no	yes	78	WISCIII	80	WISCIII	2	Lesional	performed	not_performed	not_performed	no	not_performed	yes	yes	no	performed	performed	not_performed	NA	12/11/2012	12.4	10.1	Tailored_resection	Focal_resection	left	yes	no	no	no	yes	MCD	FCD2B	Engel I	no	No_complication	No_complication	<undefined>
3652	female	yes	no	no	no	no	5.4	no	XTLE	Daily	no	no	no	109	WISCIII	121	WISCIII	12	Lesional	performed	performed	performed	yes	performed	yes	yes	no	performed	not_performed	not_performed	NA	12/13/2012	12.9	7.5	Tailored_resection	Focal_resection	left	yes	no	no	no	yes	MCD	FCD2B	Engel I	no	No_complication	No_complication	<undefined>
3680	male	no	yes	no	no	no	5.1	no	HEMI	Daily	no	no	yes	59	SB.IV	84	WAISIII	25	Lesional	performed	performed	performed	yes	not_performed	yes	yes	no	not_performed	not_performed	performed	Intracerebral_Subdural	01/15/2013	18.1	13	Tailored_resection	Multilobar_resection	right	yes	no	no	no	no	<undefined>	<undefined>	Engel I	yes	No_complication	complication_of_invasive_monitoring	Minor
3681	female	no	no	no	no	no	9.8	no	XTLE	Daily	no	no	no	74	WAISIII	69	SB.IV	-5	Lesional	performed	performed	performed	yes	not_performed	yes	yes	no	performed	performed	performed	Intracerebral_Subdural	02/05/2013	16.4	6.7	Tailored_resection	Multilobar_resection	right	yes	no	no	no	yes	MCD	FCD1	Engel I	yes	complication_of_resection	No_complication	Major
3679	female	no	yes	no	no	no	2.1	no	XTLE	Daily	no	no	no	80	WISCIII	95	WISCIII	15	Lesional	not_performed	not_performed	not_performed	no	not_performed	no	no	no	not_performed	not_performed	not_performed	NA	02/19/2013	7.2	5.1	Lesionectomy	Focal_resection	middle	no	no	no	no	no	hypothalamic_hamartoma	<undefined>	Engel II	no	No_complication	No_complication	<undefined>
3682	female	yes	yes	no	no	no	0.5	yes	XTLE	Daily	no	no	yes	38	SB.IV	38	SB.IV	0	Lesional	performed	performed	performed	yes	performed	no	yes	no	performed	performed	not_performed	NA	02/26/2013	5.6	5.1	Tailored_resection	Unilobar_resection	right	yes	no	no	no	yes	TSC	<undefined>	Engel III	no	No_complication	No_complication	<undefined>
3756	male	no	no	no	no	no	2.3	no	TLE	Daily	no	no	yes	71	WAISIII	NaN	NA	NaN	Lesional	performed	performed	performed	yes	not_performed	yes	yes	no	performed	not_performed	not_performed	NA	02/28/2013	20	17.8	Standardized_resection	Unilobar_resection	right	no	no	no	no	yes	HS	FCD3A	Engel I	no	No_complication	No_complication	<undefined>
3684	male	no	no	no	no	no	0.3	no	XTLE	Daily	no	no	no	90	WISCIII	105	WAISIII	15	Lesional	not_performed	not_performed	not_performed	no	not_performed	no	no	no	not_performed	not_performed	not_performed	NA	03/12/2013	15.3	15	Lesionectomy	Focal_resection	middle	no	no	no	no	no	hypothalamic_hamartoma	<undefined>	Engel I	yes	No_complication	No_complication	<undefined>
3683	male	yes	no	no	no	no	4.3	no	TLE	Less_than_monthly	yes	yes	no	84	WISCIII	96	WISCIII	12	Lesional	performed	not_performed	not_performed	no	not_performed	no	no	no	performed	not_performed	not_performed	NA	03/14/2013	8	3.8	Standardized_resection	Unilobar_resection	right	no	no	no	no	yes	HS	FCD3A	Engel I	no	No_complication	No_complication	<undefined>
3685	female	no	no	no	no	no	0.2	no	XTLE	Daily	yes	no	no	68	SB.IV	73	WISCIII	5	Lesional	not_performed	not_performed	not_performed	no	not_performed	no	no	no	not_performed	not_performed	not_performed	NA	03/19/2013	5	4.9	Tailored_resection	Focal_resection	middle	no	no	no	no	no	hypothalamic_hamartoma	<undefined>	Engel III	yes	No_complication	No_complication	<undefined>
3686	female	no	no	no	no	no	0.7	no	TLE	Less_than_monthly	no	no	no	112	DQ	114	SB.IV	2	Lesional	not_performed	not_performed	not_performed	no	not_performed	no	yes	no	performed	not_performed	not_performed	NA	04/02/2013	2	1.4	Standardized_resection	Unilobar_resection	left	no	no	no	no	yes	MCD	FCD2B	Engel I	no	No_complication	No_complication	<undefined>
3687	male	no	no	no	no	no	16.1	no	TLE	Daily	no	no	no	76	WAISIII	82	WAISIII	6	Lesional	performed	not_performed	not_performed	no	not_performed	no	no	no	performed	not_performed	not_performed	NA	05/07/2013	17.7	1.6	Standardized_resection	Unilobar_resection	right	no	no	no	no	yes	HS	FCD3A	Engel II	no	No_complication	No_complication	<undefined>
3688	female	no	no	no	no	no	0.4	no	TLE	Daily	no	no	no	80	WAISIII	78	WAISIII	-2	Lesional	performed	performed	performed	yes	not_performed	yes	yes	yes	performed	not_performed	not_performed	NA	05/16/2013	18.2	17.8	Standardized_resection	Unilobar_resection	left	no	no	no	no	no	MCD	FCD2A	Engel I	no	No_complication	No_complication	<undefined>
3697	male	no	no	yes	no	no	1.8	no	TLE	Weekly	no	yes	no	84	WAISIII	98	WAISIII	14	Lesional	performed	not_performed	not_performed	no	not_performed	yes	yes	no	performed	not_performed	not_performed	NA	06/17/2013	16.3	14.5	Standardized_resection	Unilobar_resection	left	no	no	no	no	yes	HS	FCD3A	Engel I	no	No_complication	No_complication	<undefined>
3696	female	no	yes	no	no	no	5.3	no	TLE	Daily	no	yes	no	51	SB.IV	42	SB.IV	-9	Lesional	performed	performed	performed	yes	not_performed	yes	yes	no	performed	not_performed	not_performed	NA	08/20/2013	7.5	2.2	Standardized_resection	Unilobar_resection	left	no	no	no	no	yes	MCD	FCD1	Engel I	no	No_complication	No_complication	<undefined>
3694	male	no	no	no	no	no	3.1	no	XTLE	Daily	no	no	no	74	WISCIII	92	WISCIII	18	Lesional	performed	performed	performed	no	performed	yes	yes	no	not_performed	not_performed	performed	Intracerebral	09/03/2013	7.1	4	Tailored_resection	Focal_resection	right	yes	no	no	no	no	MCD	FCD2B	Engel I	no	No_complication	No_complication	<undefined>
3753	female	no	yes	no	no	no	11.1	no	XTLE	Less_than_monthly	no	yes	no	106	WISCIII	112	WISCIII	6	Lesional	not_performed	not_performed	not_performed	no	performed	yes	yes	no	performed	not_performed	not_performed	NA	09/12/2013	12.6	1.5	Lesionectomy	Focal_resection	left	no	no	no	no	yes	tumour	<undefined>	Engel I	no	No_complication	No_complication	<undefined>
3751	male	no	no	no	no	no	4.2	no	XTLE	Weekly	no	no	no	124	SB.IV	116	WISCIII	-8	Lesional	performed	not_performed	not_performed	no	not_performed	yes	yes	no	performed	not_performed	not_performed	NA	09/26/2013	5.3	1.1	Extended_lesionectomy	Focal_resection	left	yes	no	no	no	yes	tumour	<undefined>	Engel I	no	No_complication	No_complication	<undefined>
3754	male	no	no	no	no	no	11.1	no	XTLE	Less_than_monthly	no	yes	no	105	WISCIII	117	WISCIII	12	Lesional	performed	not_performed	not_performed	no	not_performed	yes	yes	no	performed	performed	not_performed	NA	11/04/2013	12.7	1.7	Extended_lesionectomy	Focal_resection	right	no	no	no	no	yes	tumour	<undefined>	Engel I	no	No_complication	No_complication	<undefined>
3755	female	no	no	no	no	no	10	no	TLE	Less_than_monthly	no	yes	no	108	WISCIII	109	WISCIII	1	Lesional	performed	not_performed	not_performed	no	not_performed	no	no	no	performed	not_performed	not_performed	NA	11/18/2013	10.2	0.2	Extended_lesionectomy	Focal_resection	right	no	no	no	no	yes	tumour	<undefined>	Engel I	no	No_complication	No_complication	<undefined>
3707	male	no	yes	no	no	no	0.3	yes	XTLE	Daily	no	no	yes	31	SB.IV	25	DQ	-6	Lesional	performed	performed	performed	yes	not_performed	no	yes	no	performed	performed	not_performed	NA	11/21/2013	4.4	4	Tailored_resection	Multilobar_resection	left	yes	no	no	no	no	MCD	FCD1	Engel IV	no	No_complication	No_complication	<undefined>
3706	male	no	no	no	no	no	0	no	TLE	Weekly	no	no	no	106	DQ	101	SB.IV	-5	Lesional	performed	not_performed	not_performed	no	not_performed	no	yes	no	performed	not_performed	not_performed	NA	11/25/2013	2.9	2.9	Extended_lesionectomy	Unilobar_resection	right	no	no	no	no	yes	tumour	FCD3B	Engel I	no	No_complication	No_complication	<undefined>
3708	female	no	no	no	no	no	0.1	yes	XTLE	Daily	no	no	yes	47	DQ	40	DQ	-7	Lesional	performed	not_performed	not_performed	no	not_performed	no	yes	no	performed	not_performed	not_performed	NA	01/07/2014	0.8	0.7	Tailored_resection	Multilobar_resection	left	yes	no	no	no	yes	TSC	<undefined>	Engel I	no	No_complication	No_complication	<undefined>
3738	female	no	no	no	no	no	12.2	no	HEMI	Less_than_monthly	no	yes	no	88	WISCIII	101	WISCIII	13	Lesional	not_performed	not_performed	not_performed	no	not_performed	no	no	no	not_performed	not_performed	not_performed	NA	04/09/2014	12.6	0.5	Lesionectomy	Multilobar_resection	left	yes	no	no	no	yes	tumour	<undefined>	NA	no	No_complication	No_complication	<undefined>
3714	female	yes	no	no	no	no	7.7	no	TLE	Monthly	no	no	no	87	WISCIII	89	WISCIII	2	Lesional	performed	not_performed	not_performed	no	not_performed	yes	yes	no	performed	not_performed	not_performed	NA	05/06/2014	11.8	4.1	Standardized_resection	Unilobar_resection	right	no	no	no	no	yes	tumour	FCD3B	Engel I	no	No_complication	No_complication	<undefined>
3709	male	no	no	no	no	no	11.5	no	TLE	Daily	no	yes	no	113	WISCIII	111	WISCIII	-2	Lesional	performed	not_performed	not_performed	no	not_performed	yes	yes	no	performed	not_performed	not_performed	NA	05/12/2014	12.2	0.7	Standardized_resection	Unilobar_resection	left	no	no	no	no	yes	<undefined>	FCD3B	Engel I	no	No_complication	No_complication	<undefined>
3713	male	no	no	no	no	no	3.6	no	XTLE	Daily	no	no	no	94	WISCIII	98	WISCIII	4	Lesional	performed	performed	performed	yes	performed	yes	yes	no	performed	not_performed	not_performed	NA	05/21/2014	13.4	9.9	Tailored_resection	Focal_resection	left	yes	no	no	no	yes	MCD	FCD2B	Engel I	no	No_complication	No_complication	<undefined>
3717	female	no	no	no	no	no	3.8	no	TLE	Daily	no	no	no	116	SB.IV	118	SB.IV	2	Lesional	performed	not_performed	not_performed	no	not_performed	yes	yes	no	performed	not_performed	not_performed	NA	05/26/2014	4.5	0.7	Standardized_resection	Unilobar_resection	left	no	no	no	no	yes	vascular_lesion	<undefined>	Engel I	no	No_complication	No_complication	<undefined>
3712	female	no	no	no	no	no	5.4	no	TLE	Weekly	yes	yes	no	71	WISCIII	70	WISCIII	-1	Lesional	performed	not_performed	not_performed	no	not_performed	yes	yes	no	performed	not_performed	not_performed	NA	06/03/2014	11.6	6.2	Extended_lesionectomy	Unilobar_resection	left	no	no	no	no	yes	tumour	<undefined>	Engel I	no	No_complication	No_complication	<undefined>
3711	female	no	no	no	no	no	1.8	no	TLE	Daily	no	no	no	76	SB.IV	92	SB.IV	16	Lesional	performed	not_performed	not_performed	no	not_performed	no	yes	no	performed	performed	not_performed	NA	06/05/2014	3.5	1.7	Standardized_resection	Unilobar_resection	right	no	no	no	no	yes	tumour	<undefined>	Engel I	no	No_complication	No_complication	<undefined>
3710	female	no	no	no	no	no	13.9	no	TLE	Daily	no	no	no	81	WISCIII	87	WISCIII	6	Lesional	performed	not_performed	not_performed	no	not_performed	no	no	no	performed	performed	not_performed	NA	06/10/2014	14.5	0.6	Standardized_resection	Unilobar_resection	right	no	no	no	no	yes	tumour	<undefined>	Engel I	no	complication_of_resection	No_complication	Minor
3718	female	no	no	no	no	no	2.7	no	XTLE	Daily	no	no	no	101	SB.IV	117	SB.IV	16	Lesional	not_performed	not_performed	not_performed	no	not_performed	yes	yes	no	performed	not_performed	not_performed	NA	06/24/2014	3	0.3	Lesionectomy	Focal_resection	left	yes	no	no	no	yes	tumour	<undefined>	Engel I	no	No_complication	No_complication	<undefined>
3739	female	no	no	no	no	no	5.4	no	HEMI	Daily	no	yes	no	109	WISCIII	112	WISCIII	3	Lesional	performed	not_performed	not_performed	no	not_performed	yes	yes	no	performed	performed	not_performed	NA	06/25/2014	7.7	2.3	Lesionectomy	Focal_resection	left	yes	no	no	no	no	tumour	<undefined>	Engel I	no	No_complication	No_complication	<undefined>
3716	male	no	no	no	no	no	9.8	no	XTLE	Daily	no	yes	no	77	WISCIII	98	WISCIII	21	Lesional	not_performed	not_performed	not_performed	no	not_performed	yes	yes	no	performed	not_performed	not_performed	NA	09/01/2014	10.9	1.1	Lesionectomy	Focal_resection	left	yes	no	no	no	yes	vascular_lesion	<undefined>	Engel I	no	No_complication	No_complication	<undefined>
3733	male	no	no	no	no	no	9.3	no	XTLE	Daily	no	yes	no	96	WAISIII	91	WAISIII	-5	Lesional	performed	performed	performed	yes	performed	no	yes	no	not_performed	not_performed	performed	Intracerebral	09/30/2014	17.6	8.3	Tailored_resection	Focal_resection	right	yes	no	no	no	yes	normal	<undefined>	Engel III	yes	No_complication	No_complication	<undefined>
3715	male	no	no	no	no	no	6.5	no	TLE	Weekly	no	no	no	83	WISCIII	NaN	NA	NaN	Lesional	performed	not_performed	not_performed	no	not_performed	yes	yes	no	performed	not_performed	not_performed	NA	10/20/2014	7.8	1.3	Standardized_resection	Unilobar_resection	left	no	no	no	no	yes	tumour	FCD3B	Engel I	no	No_complication	No_complication	<undefined>
3730	female	yes	no	no	no	no	10.7	no	TLE	Weekly	no	yes	no	65	SB.IV	73	WISCIII	8	Lesional	performed	not_performed	not_performed	no	not_performed	yes	yes	no	performed	not_performed	not_performed	NA	10/27/2014	14.2	3.5	Standardized_resection	Unilobar_resection	left	no	no	no	no	yes	HS	FCD3A	Engel I	no	No_complication	No_complication	<undefined>
3731	male	no	no	no	no	no	0.9	no	TLE	Daily	no	no	no	91	DQ	98	SB.IV	7	Lesional	not_performed	not_performed	not_performed	no	not_performed	no	yes	no	performed	not_performed	not_performed	NA	11/04/2014	2	1.1	Tailored_resection	Multilobar_resection	left	yes	no	no	no	yes	tumour	FCD3B	Engel I	no	No_complication	No_complication	<undefined>
3726	female	no	no	no	no	no	8.5	no	TLE	Weekly	no	yes	no	71	WISCIII	75	WISCIII	4	Lesional	performed	not_performed	not_performed	no	not_performed	yes	yes	no	performed	performed	not_performed	NA	11/18/2014	15	6.5	Standardized_resection	Unilobar_resection	left	no	no	no	no	yes	MCD	FCD2B	Engel I	no	No_complication	No_complication	<undefined>
3723	female	no	no	no	no	no	0.1	no	XTLE	Daily	no	no	no	56	SB.IV	46	SB.IV	-10	Lesional	not_performed	not_performed	not_performed	no	not_performed	no	no	no	not_performed	not_performed	not_performed	NA	11/25/2014	8.2	8.1	Lesionectomy	Focal_resection	middle	no	no	no	no	no	hypothalamic_hamartoma	<undefined>	Engel I	yes	complication_of_resection	No_complication	Major
3785	female	no	no	no	no	no	1.8	no	TLE	Less_than_monthly	no	no	no	104	DQ	103	SB.IV	-1	Lesional	performed	not_performed	not_performed	no	not_performed	no	yes	no	performed	not_performed	not_performed	NA	12/08/2014	2.4	0.6	Extended_lesionectomy	Focal_resection	right	no	no	no	no	yes	tumour	FCD3B	Engel I	no	No_complication	No_complication	<undefined>
3722	female	no	yes	no	no	no	0.1	yes	HEMI	Daily	yes	no	yes	69	DQ	NaN	NA	NaN	Lesional	performed	not_performed	not_performed	no	not_performed	no	no	no	not_performed	not_performed	not_performed	NA	01/08/2015	0.6	0.5	Hemisferectomy	Hemisferectomy	right	no	no	no	no	yes	MCD	unspecified_MCD	Engel I	no	complication_of_resection	No_complication	Minor
3727	female	no	yes	no	no	no	1.8	no	HEMI	Daily	no	no	yes	31	SB.IV	38	SB.IV	7	Lesional	performed	not_performed	not_performed	no	not_performed	no	yes	no	not_performed	not_performed	not_performed	NA	01/09/2015	11.5	9.7	Hemisferectomy	Hemisferectomy	right	no	no	no	no	yes	glial scar	<undefined>	Engel I	no	No_complication	No_complication	<undefined>
3728	female	no	no	no	no	no	3.8	no	TLE	Weekly	no	no	no	108	SB.IV	88	SB.IV	-20	Lesional	performed	not_performed	not_performed	no	not_performed	no	yes	no	performed	not_performed	not_performed	NA	03/05/2015	4.7	1	Tailored_resection	Unilobar_resection	right	no	no	no	no	yes	MCD	unspecified_MCD	Engel II	yes	No_complication	No_complication	<undefined>
3732	male	no	no	no	no	no	1.3	no	XTLE	Weekly	no	no	no	58	SB.IV	41	SB.IV	-17	Lesional	performed	not_performed	not_performed	no	not_performed	no	yes	no	performed	not_performed	not_performed	NA	03/10/2015	11	9.7	Tailored_resection	Focal_resection	right	yes	no	no	no	yes	TSC	<undefined>	Engel I	no	No_complication	No_complication	<undefined>
3737	male	no	no	no	no	no	5.8	no	TLE	Daily	no	no	no	78	WISCIII	80	WISCIII	2	Lesional	performed	not_performed	not_performed	no	not_performed	no	no	no	performed	not_performed	not_performed	NA	03/24/2015	7.6	1.9	Standardized_resection	Unilobar_resection	right	no	no	no	no	yes	tumour	FCD3B	Engel III	no	No_complication	No_complication	<undefined>
3741	male	no	no	no	no	yes	6.6	no	HEMI	Daily	yes	yes	yes	72	WISCIII	87	WISCIII	15	Lesional	not_performed	not_performed	not_performed	no	not_performed	yes	yes	no	not_performed	not_performed	not_performed	NA	03/30/2015	10.2	3.6	Hemisferectomy	Hemisferectomy	left	no	no	no	no	yes	encephalitis	<undefined>	Engel I	no	No_complication	No_complication	<undefined>
3734	female	no	no	no	yes	no	1.1	no	XTLE	Daily	no	no	no	66	SB.IV	63	SB.IV	-3	Lesional	performed	performed	performed	yes	not_performed	yes	yes	no	performed	performed	not_performed	NA	03/31/2015	16.9	15.8	Tailored_resection	Focal_resection	right	yes	no	no	no	yes	MCD	FCD2B	Engel I	no	No_complication	No_complication	<undefined>
3735	female	no	no	no	no	no	6.1	no	TLE	Daily	no	no	no	106	WISCIII	NaN	NA	NaN	Lesional	performed	not_performed	not_performed	no	not_performed	no	yes	no	performed	not_performed	not_performed	NA	04/02/2015	6.8	0.7	Standardized_resection	Unilobar_resection	right	no	no	no	no	yes	tumour	FCD3B	Engel I	no	No_complication	No_complication	<undefined>
3736	male	no	no	no	no	no	10	no	XTLE	Daily	no	yes	no	93	WAISIII	101	WAISIII	8	Lesional	performed	performed	performed	yes	performed	yes	yes	no	not_performed	not_performed	performed	Intracerebral	04/14/2015	17.9	7.9	Tailored_resection	Focal_resection	left	yes	no	no	no	yes	MCD	FCD2B	Engel I	no	No_complication	No_complication	<undefined>
3743	male	yes	no	no	no	no	7.6	no	XTLE	Daily	no	yes	yes	NaN	NA	NaN	NA	NaN	Lesional	performed	not_performed	not_performed	no	not_performed	yes	yes	no	performed	not_performed	not_performed	NA	06/25/2015	17.1	9.5	Tailored_resection	Unilobar_resection	left	yes	yes	no	no	yes	MCD	FCD2B	Engel I	no	complication_of_resection	No_complication	Minor
3742	male	no	no	no	no	no	1.2	no	XTLE	Monthly	yes	yes	yes	70	SB.IV	72	SB.IV	2	Lesional	performed	performed	performed	yes	performed	no	yes	no	performed	performed	performed	Intracerebral	07/01/2015	4.3	3.1	Tailored_resection	Focal_resection	right	yes	no	no	no	yes	MCD	FCD1	Engel I	no	No_complication	No_complication	<undefined>
3744	female	no	no	no	no	no	14.8	no	TLE	Daily	no	yes	no	111	WAISIII	116	WAISIII	5	Lesional	performed	not_performed	not_performed	no	not_performed	yes	yes	no	performed	performed	not_performed	NA	07/01/2015	17.7	2.9	Tailored_resection	Focal_resection	left	no	no	no	no	yes	tumour	FCD3B	Engel I	no	No_complication	No_complication	<undefined>
3745	male	no	no	no	no	no	1.1	no	TLE	Weekly	yes	yes	no	83	DQ	76	SB.IV	-7	Lesional	performed	not_performed	not_performed	no	not_performed	no	yes	no	performed	not_performed	not_performed	NA	07/02/2015	2.1	1	Standardized_resection	Unilobar_resection	left	no	no	no	no	yes	MCD	unspecified_MCD	Engel I	no	No_complication	No_complication	<undefined>
3746	female	no	no	no	no	no	14	no	XTLE	Daily	no	no	no	86	WAISIII	NaN	NA	NaN	Lesional	performed	not_performed	not_performed	no	not_performed	yes	yes	no	performed	performed	not_performed	NA	07/07/2015	17.2	3.2	Tailored_resection	Focal_resection	right	no	no	no	no	yes	tumour	FCD3B	Engel I	no	No_complication	No_complication	<undefined>
3748	female	no	no	no	no	no	0.3	no	TLE	Daily	no	no	no	NaN	NA	NaN	NA	NaN	Lesional	performed	not_performed	not_performed	no	not_performed	yes	yes	no	performed	not_performed	not_performed	NA	08/25/2015	10.4	10.2	Tailored_resection	Unilobar_resection	left	no	no	no	no	yes	tumour	FCD3B	Engel I	no	complication_of_resection	No_complication	Minor
3747	female	no	no	no	no	no	10	no	TLE	Daily	no	yes	no	78	WISCIII	82	WISCIII	4	Lesional	performed	not_performed	not_performed	no	not_performed	yes	yes	no	performed	not_performed	not_performed	NA	08/27/2015	14.6	4.6	Standardized_resection	Unilobar_resection	left	no	no	no	no	yes	tumour	<undefined>	Engel I	no	No_complication	No_complication	<undefined>
3762	female	yes	no	no	no	no	7.1	no	XTLE	Weekly	no	no	no	65	SB.IV	78	WAISIII	13	Lesional	performed	not_performed	not_performed	no	not_performed	yes	yes	no	performed	performed	performed	Intracerebral	09/29/2015	17	10	Tailored_resection	Focal_resection	left	no	yes	no	no	yes	TSC	<undefined>	Engel I	yes	No_complication	No_complication	<undefined>
3765	male	no	no	no	no	no	0.7	no	XTLE	Daily	no	yes	no	67	SB.IV	69	SB.IV	2	Lesional	not_performed	not_performed	not_performed	no	not_performed	no	no	no	not_performed	not_performed	not_performed	NA	10/12/2015	12.5	11.8	Lesionectomy	Focal_resection	middle	no	no	no	no	no	hypothalamic_hamartoma	<undefined>	Engel II	yes	No_complication	No_complication	<undefined>
3768	female	no	yes	no	no	no	11	no	TLE	Weekly	no	yes	no	66	SB.IV	82	WISCIII	16	Lesional	performed	not_performed	not_performed	no	not_performed	yes	yes	no	performed	not_performed	not_performed	NA	10/20/2015	14.3	3.3	Standardized_resection	Unilobar_resection	right	no	no	no	no	yes	MCD	FCD1	Engel III	no	No_complication	No_complication	<undefined>
3759	male	no	yes	no	no	no	0.5	yes	HEMI	Daily	no	no	yes	98	DQ	108	DQ	10	Lesional	not_performed	not_performed	not_performed	no	not_performed	no	yes	no	not_performed	not_performed	not_performed	NA	10/22/2015	1.4	0.9	Hemisferectomy	Hemisferectomy	right	no	no	no	no	yes	glial scar	<undefined>	Engel I	no	No_complication	No_complication	<undefined>
3766	male	no	no	no	no	no	1	no	XTLE	Daily	no	no	no	72	DQ	70	SB.IV	-2	Lesional	performed	not_performed	not_performed	no	not_performed	no	yes	no	performed	not_performed	not_performed	NA	10/29/2015	2.8	1.8	Extended_lesionectomy	Focal_resection	left	yes	no	no	no	yes	MCD	FCD1	Engel IV	yes	No_complication	No_complication	<undefined>
3767	male	yes	no	no	no	no	4	no	TLE	Weekly	no	yes	no	96	WISCIII	98	WISCIII	2	Lesional	performed	not_performed	not_performed	no	not_performed	no	no	no	performed	not_performed	not_performed	NA	11/03/2015	13.7	9.7	Standardized_resection	Unilobar_resection	right	no	no	no	no	yes	HS	<undefined>	Engel I	yes	No_complication	No_complication	<undefined>
3761	male	no	no	no	no	no	6.3	no	XTLE	Weekly	no	no	no	98	WISCIII	94	WISCIII	-4	Lesional	not_performed	not_performed	not_performed	no	not_performed	yes	yes	no	performed	not_performed	not_performed	NA	11/23/2015	6.7	0.4	Extended_lesionectomy	Focal_resection	left	no	no	no	no	yes	tumour	<undefined>	Engel I	no	No_complication	No_complication	<undefined>
3760	female	no	no	no	no	no	15.8	no	TLE	Weekly	no	yes	no	91	WAISIII	98	WAISIII	7	Lesional	performed	not_performed	not_performed	no	not_performed	no	no	no	performed	not_performed	not_performed	NA	12/03/2015	18.9	3.1	Standardized_resection	Unilobar_resection	right	no	no	no	no	yes	tumour	FCD3B	Engel I	no	No_complication	No_complication	<undefined>
3770	female	no	no	no	no	no	0.3	no	XTLE	Daily	no	yes	yes	72	SB.IV	67	SB.IV	-5	Lesional	performed	performed	performed	yes	not_performed	no	yes	no	performed	performed	performed	Intracerebral	01/18/2016	3.2	2.9	Tailored_resection	Focal_resection	right	yes	no	no	no	yes	TSC	<undefined>	<undefined>	no	No_complication	No_complication	<undefined>
3771	male	no	no	no	no	no	12.3	no	TLE	Less_than_monthly	no	yes	no	84	WAISIII	NaN	NA	NaN	Lesional	performed	not_performed	not_performed	no	not_performed	yes	yes	yes	performed	not_performed	not_performed	NA	02/29/2016	17.6	5.3	Tailored_resection	Focal_resection	left	no	no	no	no	yes	tumour	<undefined>	<undefined>	no	No_complication	No_complication	<undefined>
3773	male	yes	no	no	no	no	0	no	HEMI	Daily	yes	yes	yes	NaN	NA	NaN	NA	NaN	Lesional	not_performed	not_performed	not_performed	no	not_performed	no	no	no	not_performed	not_performed	not_performed	NA	03/22/2016	0.6	0.6	Hemisferectomy	Hemisferectomy	left	no	no	no	no	yes	MCD	unspecified_MCD	<undefined>	no	No_complication	No_complication	<undefined>
3780	male	no	no	no	no	no	5.8	no	XTLE	Daily	no	no	no	88	WISCIII	96	WISCIII	8	Lesional	performed	performed	performed	yes	not_performed	yes	yes	no	performed	performed	performed	Intracerebral	03/24/2016	13	7.2	Tailored_resection	Focal_resection	left	yes	no	no	no	yes	normal	<undefined>	<undefined>	no	No_complication	No_complication	<undefined>
3781	male	no	no	no	no	no	1.3	no	XTLE	Daily	no	no	no	85	WISCIII	87	WISCIII	2	Lesional	performed	performed	performed	yes	not_performed	yes	yes	no	performed	not_performed	not_performed	NA	03/29/2016	9.2	7.9	Tailored_resection	Focal_resection	left	no	no	no	no	yes	MCD	FCD2B	<undefined>	no	No_complication	No_complication	<undefined>
3782	female	yes	no	no	no	no	0.5	no	TLE	Weekly	no	yes	no	54	SB.IV	NaN	NA	NaN	Lesional	performed	not_performed	not_performed	no	not_performed	no	no	no	performed	performed	not_performed	NA	03/30/2016	18.2	17.7	Tailored_resection	Unilobar_resection	right	no	no	no	no	yes	HS	FCD3A	<undefined>	no	No_complication	No_complication	<undefined>
3775	male	yes	no	no	no	no	6	no	XTLE	Daily	no	no	no	74	WISCIII	86	WISCIII	12	Lesional	performed	performed	performed	no	not_performed	yes	yes	no	performed	not_performed	not_performed	NA	05/31/2016	8.1	2.1	Tailored_resection	Focal_resection	left	no	no	no	no	yes	MCD	FCD2A	<undefined>	no	No_complication	No_complication	<undefined>
3783	male	no	no	no	no	no	0.1	no	TLE	Monthly	no	yes	no	58	SB.IV	NaN	NA	NaN	Lesional	performed	not_performed	not_performed	no	not_performed	yes	yes	no	performed	not_performed	not_performed	NA	09/06/2016	14	13.9	Extended_lesionectomy	Focal_resection	left	no	no	no	no	no	tumour	FCD3B	<undefined>	yes	No_complication	No_complication	<undefined>
3784	female	no	no	no	no	no	4.3	no	TLE	Weekly	yes	yes	no	105	WISCIII	NaN	NA	NaN	Lesional	performed	performed	not_performed	no	not_performed	yes	yes	no	performed	not_performed	not_performed	NA	10/03/2016	8.5	4.2	Tailored_resection	Unilobar_resection	left	no	no	no	no	yes	HS	FCD3A	<undefined>	no	No_complication	No_complication	<undefined>
3777	female	no	no	no	no	no	6.7	no	XTLE	Daily	no	no	no	93	WISCIII	NaN	NA	NaN	Lesional	not_performed	not_performed	not_performed	no	not_performed	no	yes	no	performed	not_performed	not_performed	NA	10/10/2016	7.2	0.5	Extended_lesionectomy	Focal_resection	left	yes	no	no	no	yes	tumour	FCD3B	<undefined>	no	No_complication	No_complication	<undefined>
3792	male	no	yes	no	no	no	0	yes	HEMI	Daily	no	no	yes	NaN	NA	NaN	<undefined>	NaN	Lesional	not_performed	not_performed	not_performed	no	not_performed	no	no	no	not_performed	not_performed	not_performed	NA	11/15/2016	1.5	1.5	Hemisferectomy	Hemisferectomy	left	no	no	no	no	yes	glial scar	<undefined>	<undefined>	no	complication_of_resection	No_complication	Major
3787	male	no	no	no	no	no	0.3	no	XTLE	Daily	no	no	no	75	DQ	NaN	<undefined>	NaN	Lesional	performed	not_performed	not_performed	no	not_performed	no	yes	no	performed	not_performed	not_performed	NA	11/29/2016	1.8	1.5	Tailored_resection	Focal_resection	right	yes	no	no	no	yes	MCD	FCD2A	<undefined>	no	No_complication	No_complication	<undefined>
3788	male	no	no	no	no	no	3	no	HEMI	Daily	yes	yes	yes	42	<undefined>	NaN	<undefined>	NaN	Lesional	performed	not_performed	not_performed	no	not_performed	no	yes	no	not_performed	not_performed	not_performed	NA	12/01/2016	8.9	5.9	Hemisferectomy	Hemisferectomy	right	no	no	no	no	yes	encephalitis	<undefined>	<undefined>	no	No_complication	No_complication	<undefined>
3794	male	yes	no	no	no	no	0.4	no	XTLE	Daily	no	no	yes	NaN	NA	NaN	<undefined>	NaN	Lesional	performed	performed	performed	yes	not_performed	no	yes	no	performed	performed	performed	Intracerebral	12/12/2016	9.4	9	Tailored_resection	Multilobar_resection	right	no	no	no	no	yes	TSC	<undefined>	<undefined>	no	No_complication	No_complication	<undefined>
3789	female	no	no	no	no	no	0.3	yes	XTLE	Daily	no	yes	yes	84	DQ	NaN	<undefined>	NaN	Lesional	performed	not_performed	not_performed	no	not_performed	no	yes	no	performed	not_performed	not_performed	NA	02/09/2017	1.6	1.3	Lesionectomy	Focal_resection	left	yes	no	no	no	yes	MCD	FCD2A	<undefined>	no	No_complication	No_complication	<undefined>
3791	female	yes	no	no	no	no	4.6	no	XTLE	Daily	yes	yes	yes	64	WISCIII	NaN	<undefined>	NaN	Normal	performed	performed	performed	yes	performed	no	yes	no	performed	performed	performed	Intracerebral	02/14/2017	10.6	6	Tailored_resection	Focal_resection	left	no	no	no	no	yes	MCD	FCD1	<undefined>	no	No_complication	No_complication	<undefined>
3690	female	no	no	no	no	no	0.7	no	TLE	Daily	no	no	yes	38	DQ	NaN	<undefined>	NaN	Lesional	not_performed	performed	performed	yes	not_performed	no	yes	no	performed	performed	performed	Intracerebral	04/04/2017	6.5	5.8	Tailored_resection	Multilobar_resection	right	yes	no	no	no	yes	TSC	<undefined>	<undefined>	yes	No_complication	No_complication	<undefined>
3793	male	no	yes	no	no	no	1.1	no	TLE	Monthly	no	no	no	70	<undefined>	NaN	<undefined>	NaN	Lesional	not_performed	not_performed	not_performed	no	not_performed	no	no	no	performed	performed	not_performed	NA	04/21/2017	4	2.9	Extended_lesionectomy	Unilobar_resection	right	no	no	no	no	yes	tumour	<undefined>	<undefined>	no	No_complication	No_complication	<undefined>
3797	male	no	no	no	no	no	0	no	HEMI	Daily	no	no	yes	NaN	NA	NaN	<undefined>	NaN	Lesional	performed	not_performed	not_performed	no	not_performed	no	yes	no	not_performed	not_performed	not_performed	NA	05/04/2017	0.4	0.4	Hemisferectomy	Hemisferectomy	left	no	no	no	no	no	MCD	unspecified_MCD	<undefined>	no	No_complication	No_complication	<undefined>
3799	male	no	no	no	no	no	0.8	no	XTLE	Monthly	no	no	no	72	DQ	NaN	<undefined>	NaN	Lesional	performed	not_performed	not_performed	no	not_performed	no	yes	no	performed	not_performed	not_performed	NA	05/09/2017	2.4	1.6	Tailored_resection	Focal_resection	right	yes	no	no	no	yes	tumour	<undefined>	<undefined>	no	complication_of_resection	No_complication	Minor
3796	female	no	yes	no	no	no	0.2	yes	HEMI	Daily	no	no	yes	75	DQ	NaN	<undefined>	NaN	Lesional	not_performed	not_performed	not_performed	no	not_performed	no	no	no	not_performed	not_performed	not_performed	NA	05/16/2017	0.8	0.6	Hemisferectomy	Hemisferectomy	right	no	no	no	no	yes	MCD	unspecified_MCD	<undefined>	no	No_complication	No_complication	<undefined>
3795	male	no	no	no	no	no	4.2	no	HEMI	Daily	no	yes	yes	31	DQ	NaN	<undefined>	NaN	Lesional	performed	not_performed	not_performed	no	not_performed	no	no	no	not_performed	not_performed	not_performed	NA	05/23/2017	12.3	8.1	Hemisferectomy	Hemisferectomy	right	no	no	no	no	yes	glial scar	<undefined>	<undefined>	no	complication_of_resection	No_complication	Minor
3801	female	no	no	no	no	no	10.3	no	XTLE	Daily	no	no	no	NaN	NA	NaN	<undefined>	NaN	Normal	performed	performed	performed	yes	not_performed	yes	yes	no	performed	not_performed	performed	Intracerebral	06/13/2017	17	6.7	Tailored_resection	Focal_resection	left	yes	yes	no	no	yes	normal	<undefined>	<undefined>	no	complication_of_resection	No_complication	Minor
3802	male	no	no	no	no	no	5.3	no	XTLE	Monthly	no	no	no	96	WISCIII	NaN	<undefined>	NaN	Lesional	performed	not_performed	not_performed	no	not_performed	yes	yes	no	performed	not_performed	not_performed	NA	06/30/2017	15.6	10.3	Tailored_resection	Focal_resection	right	no	no	no	no	yes	MCD	FCD2B	<undefined>	no	No_complication	No_complication	<undefined>
3803	female	no	no	no	no	no	0.9	yes	XTLE	Daily	yes	no	yes	NaN	NA	NaN	<undefined>	NaN	Lesional	performed	not_performed	not_performed	no	not_performed	no	yes	no	performed	performed	not_performed	NA	09/12/2017	2.4	1.4	Tailored_resection	Multilobar_resection	left	yes	no	no	no	yes	tumour	FCD3B	<undefined>	no	complication_of_resection	No_complication	Major
3804	male	no	no	no	no	no	4	no	TLE	Daily	no	yes	yes	71	WISCIII	NaN	<undefined>	NaN	Lesional	performed	not_performed	not_performed	no	not_performed	yes	yes	no	performed	performed	not_performed	NA	09/19/2017	16.4	12.4	Tailored_resection	Unilobar_resection	left	no	no	no	no	yes	tumour	FCD3B	<undefined>	yes	No_complication	No_complication	<undefined>
3800	female	no	no	no	no	no	6.5	no	XTLE	Daily	no	no	no	112	WISCIII	NaN	<undefined>	NaN	Lesional	performed	not_performed	not_performed	no	not_performed	yes	yes	no	performed	not_performed	performed	Intracerebral	09/26/2017	15.4	8.9	Tailored_resection	Focal_resection	right	yes	no	no	no	yes	MCD	FCD2B	<undefined>	no	No_complication	No_complication	<undefined>
3805	female	yes	yes	yes	no	no	1.1	no	XTLE	Daily	yes	no	no	75	<undefined>	NaN	<undefined>	NaN	Lesional	performed	not_performed	not_performed	no	performed	no	yes	no	performed	not_performed	not_performed	NA	10/10/2017	8.2	7.1	Tailored_resection	Focal_resection	right	no	no	no	no	yes	MCD	FCD2B	<undefined>	no	No_complication	No_complication	<undefined>
3808	female	no	no	no	no	no	12	no	TLE	Monthly	no	no	no	NaN	NA	NaN	<undefined>	NaN	Lesional	not_performed	performed	performed	yes	not_performed	yes	yes	no	performed	performed	not_performed	NA	10/11/2017	15.3	3.3	Extended_lesionectomy	Unilobar_resection	left	no	no	no	no	yes	tumour	FCD3B	<undefined>	no	No_complication	No_complication	<undefined>
[truncated: 7 more columns]
