# Supplementary material for: Cognitive performance in distinct groups of children undergoing epilepsy surgery—a single-centre experience
Source: PeerJ. 2019 Oct 8;7:e7790. doi: 10.7717/peerj.7790 (PMC6788437; doi:10.7717/peerj.7790)
Supplement: Supplemental Information 3 — CI: confidence interval, SE: standard error, SD: standard deviation, TLE: temporal lobe epilepsy, XTLE: extratemporal lobe epilepsy, HEMI: hemispheric epilepsy, FCD: focal cortical dysplasia, MCD: malformations of cortical development, TSC: tuberous sclerosis complex, FBTCS: focal to bilateral tonic clonic seizure, LEAT: long-term epilepsy-associated tumours. [file peerj-07-7790-s003.xlsx]

## Sheet: presurgical IQ whole dataset
Determinants of pre-surgical IQ/DQ (whole dataset)
variable name	median difference	mean difference	p-value	effect size	Fstat	df
sex			0.492908	-0.00278666	0.472005	189
family history of epilepsy			0.0714471	0.0118901	3.2863	189
prenatal risks	8(0,17)	9.03473(1,17)	0.0310298	0.0192112	4.72163	189
febrile seizures			0.433012	-0.00201793	0.617365	189
trauma			0.648912	-0.0041862	0.207938	189
inflammation			0.713542	-0.00457255	0.13517	189
age at first seizure			<0.001	0.125183		189
infantile spasms	20(9,30)	19.0751(10,28)	<0.001	0.070018	15.305	189
epileptic syndrome			0.00136757	0.0578346	6.83155	188
seizure frequency			0.0353377	0.0294339	2.92068	187
status epilepticus	11(2,20)	10.6584(2,19)	0.0177091	0.0242627	5.72455	189
FBTCS			0.991525	-0.0052904	0.000113113	189
abnormal neurological finding	18(13,25)	18.4617(13,24)	<0.001	0.171141	40.2308	189
MRI finding			0.989048	-0.00529	0.000188908	189
histopathology			<0.001	0.184299	6.28135	189
FCD class			0.000849213	0.145387	4.57253	189
age class12			0.31147	0.000157565	1.02994	189
age class6			0.227535	0.00244511	1.46571	189

## Sheet: presurgical IQ before 2011
Determinants of pre-surgical IQ/DQ (before 2011)
variable name		median difference	mean difference	p-value	effect size	Fstat	df
sex				0.290647	0.00179392	1.13299	73
family history of epilepsy				0.209489	0.00808421	1.60311	73
prenatal risks				0.835798	-0.0130981	0.0432695	73
febrile seizures				0.120078	0.019528	2.47386	73
trauma				0.834971	-0.013092	0.0437127	73
inflammation				0.963924	-0.01367	0.00205988	73
age at first seizure				4.74e-05	0.204048		73
infantile spasms		35.5(14,55)	35.3944(18,53)	<0.001	0.155441	14.6197	73
epileptic syndrome				0.0163521	0.0831965	4.35761	72
seizure frequency				0.255456	0.0152322	1.38154	71
status epilepticus		16.5(3,28)	16.5077(4,29)	0.0121569	0.0705078	6.61337	73
FBTCS				0.858807	-0.0132563	0.0318705	73
abnormal neurological finding		15(5,24)	14.2755(6,23)	0.00195885	0.111859	10.3201	73
MRI finding				0.97265	-0.0136822	0.00118358	73
histopathology				0.0173958	0.128496	2.79388	67
FCD class				0.0218603	0.168417	3.22779	40
age class12				0.305164	0.000896825	1.06642	73
age class6		-16.5(-30,-4)	-16.3387(-27,-5)	0.00548432	0.0885906	8.19293	73

## Sheet: presurgical IQ after 2011
Determinants of pre-surgical IQ/DQ (after 2011)
variable name		median difference	mean difference	p-value	effect size	Fstat	df
sex				0.956669	-0.00874569	0.0029652	114
family history of epilepsy				0.200296	0.00570105	1.65938	114
prenatal risks		14(3,28)	14.664(4,25)	0.00796673	0.0519035	7.29567	114
febrile seizures				0.329479	-0.00035547	0.959135	114
trauma				0.45604	-0.00384599	0.559405	114
inflammation				0.621629	-0.00660932	0.244918	114
age at first seizure				0.00206264	0.080233		114
infantile spasms		13(1,27)	13.64(3,25)	0.0207882	0.0376267	5.49625	114
epileptic syndrome				0.0336198	0.0416118	3.49657	113
seizure frequency				0.0497288	0.0422244	2.68996	112
status epilepticus				0.317069	8.56e-05	1.00984	114
FBTCS				0.810271	-0.0082598	0.0579044	114
abnormal neurological finding		23(15,32)	23.0229(16,30)	<0.001	0.228457	35.0519	114
MRI finding				0.88621	-0.00858994	0.0205699	114
histopathology				<0.001	0.207263	4.69302	105
FCD class				0.000612744	0.256536	5.14066	55
age class12				0.692614	-0.00738399	0.157065	114
age class6				0.678317	-0.00724416	0.172913	114

## Sheet: psych change IQ whole dataset
Determinants of IQ/DQ change (whole dataset)
variable name		median difference	mean difference	p-value	effect size	Fstat	df
sex				0.405895	-0.00199974	0.694651	152
family history of epilepsy				0.549088	-0.00419687	0.360562	152
prenatal risks				0.212688	0.00368677	1.56616	152
febrile seizures				0.523676	-0.00388079	0.408535	152
trauma				0.408093	-0.00204235	0.688158	152
inflammation				0.0848628	0.0129565	3.00837	152
age at first seizure				0.0588006	0.0232944		152
infantile spasms				0.38676	-0.00161416	0.753431	152
epileptic syndrome				0.0017309	0.068602	6.6346	151
seizure frequency				0.419121	-0.00102071	0.947997	150
status epilepticus				0.832412	-0.00628148	0.0449327	152
FBTCS				0.618478	-0.00493249	0.249033	152
abnormal neurological finding				0.594571	-0.0046987	0.284462	152
MRI finding				0.434763	-0.00253379	0.61331	152
age at surgery				0.0109795	0.0417979		152
duration of epilepsy at surgery				0.220243	0.00987026		152
surgery type				0.0253784	0.0464519	2.86334	149
surgery extent				0.0112681	0.0524379	3.82233	150
surgery localization				0.470189	-0.00316812	0.758404	151
complete resection				0.38344	-0.00154447	0.764061	152
histopathology				0.329229	0.00826342	1.15727	143
FCD class				0.150813	0.0400099	1.67517	76
complication type				0.92655	-0.0660421	0.00878869	15
FCD1				0.0467303	0.0366366	4.08042	80
FCD2A				0.73566	-0.0110495	0.114775	80
FCD2B				0.896305	-0.0122837	0.0170944	80
FCD3A				0.022316	0.0518538	5.42987	80
FCD3B				0.873547	-0.0121775	0.0254932	80
unspecified MCD				0.530879	-0.00751098	0.396146	80
epoch				0.774668	-0.0060346	0.082245	152
1 year follow-up period				0.292069	0.00504164	1.25505	148
age class12		-4(-7,-2)	-4.62069(-7,-2)	0.00350848	0.0484788	8.79515	152
age class6		-4(-8,-1)	-3.97105(-7,-1)	0.0274015	0.0252327	4.96055	152
early post-operative seizures				0.083615	0.0132	3.03317	151

## Sheet: psych change before 2011
Determinants of IQ/DQ change (before 2011)
variable name		median difference	mean difference	p-value	effect size	Fstat	df
sex				0.465171	-0.00723997	0.539973	63
family history of epilepsy		8(0,15)	7.62302(1,14)	0.0404187	0.0501489	4.37898	63
prenatal risks				0.969871	-0.0158498	0.00143797	63
febrile seizures				0.966082	-0.0158436	0.00182262	63
trauma				0.606742	-0.0115758	0.267624	63
inflammation				0.268178	0.00385995	1.24799	63
age at first seizure				0.326267	0.0152996		63
infantile spasms				0.289719	0.00218327	1.14004	63
epileptic syndrome				0.0536638	0.0606871	3.06746	62
seizure frequency				0.979813	-0.0460114	0.0616006	61
status epilepticus				0.707765	-0.0135917	0.141798	63
FBTCS				0.371054	-0.0029511	0.811686	63
abnormal neurological finding				0.0964219	0.0280675	2.8482	63
MRI finding				0.606742	-0.0115758	0.267624	63
age at surgery				0.684546	0.00263728		63
duration of epilepsy at surgery				0.609804	0.00415856		63
surgery type				0.156365	0.0433277	1.72464	60
surgery extent				0.0192143	0.107206	3.5617	61
surgery localization				0.295915	0.00750315	1.24192	62
complete resection		-6(-13,-1)	-6.71301(-12,-1)	0.023882	0.0637713	5.35936	63
histopathology				0.974332	-0.0806842	0.203624	58
FCD class				0.537815	-0.0217057	0.792865	35
early post-operative seizures				0.0797162	0.033357	3.17401	62
complication type				0.0575227	0.34159	5.15048	7
FCD1				0.208834	0.0160091	1.63451	38
FCD2A				NaN	0	NaN	39
FCD2B				0.749834	-0.0235373	0.103156	38
FCD3A				0.210288	0.0157454	1.62389	38
FCD3B				0.976143	-0.0262913	0.000906159	38
unspecified MCD				0.467593	-0.0119772	0.538416	38
epoch				NaN	0	NaN	64
1 year follow-up period				0.705854	-0.0214041	0.350377	60
age class12				0.132755	0.0202025	2.31962	63
age class6				0.49003	-0.00815838	0.482089	63

## Sheet: psych change after 2011
Determinants of IQ/DQ change (after 2011)
variable name		median difference	mean difference	p-value	effect size	Fstat	df
sex				0.662681	-0.00927164	0.191591	87
family history of epilepsy				0.265948	0.00287353	1.2536	87
prenatal risks				0.0725089	0.0255252	3.30505	87
febrile seizures				0.149269	0.0125343	2.11702	87
trauma				0.485935	-0.00583286	0.489685	87
inflammation				0.187524	0.008614	1.76462	87
age at first seizure				0.0870497	0.0332833		87
infantile spasms				0.0597088	0.0291252	3.6399	87
epileptic syndrome				0.0226278	0.0630421	3.96049	86
seizure frequency				0.282752	0.00982675	1.29111	85
status epilepticus				0.904151	-0.0113247	0.0145857	87
FBTCS				0.105232	0.0187326	2.67994	87
abnormal neurological finding				0.323306	-0.000151221	0.986695	87
MRI finding				0.554702	-0.00742194	0.351681	87
age at surgery				0.000739352	0.123342		87
duration of epilepsy at surgery				0.025574	0.055994		87
surgery type				0.131655	0.0361328	1.82472	84
surgery extent				0.303911	0.00777795	1.22994	85
surgery localization				0.958815	-0.0222555	0.0420781	86
complete resection				0.297086	0.0011395	1.10039	87
histopathology				0.0203126	0.118703	2.44793	78
FCD class				0.11739	0.0995807	1.90687	36
early post-operative seizures				0.383072	-0.00263676	0.768575	87
complication type				0.0273547	0.514115	8.40671	6
FCD1				0.116552	0.0369541	2.57326	40
FCD2A				0.74859	-0.0223382	0.104147	40
FCD2B				0.482171	-0.0122633	0.503294	40
FCD3A				0.0378806	0.0809452	4.61105	40
FCD3B				0.849929	-0.0240715	0.0362667	40
unspecified MCD				0.0993716	0.0430903	2.84626	40
epoch				NaN	0	NaN	88
1 year follow-up period				0.231852	0.0153674	1.45781	85
age class12		-5(-9,-2)	-5.26939(-9,-2)	0.00893126	0.0653675	7.15466	87
age class6		-8(-12,-4)	-7.5908(-11,-4)	<0.001	0.128446	13.969	87

## Sheet: postsurgical IQ whole dataset
Determinants of post-surgical IQ/DQ (whole dataset)
variable name		median difference	mean difference	p-value	effect size	Fstat	df
sex				0.0790623	0.0135266	3.12538	154
family history of epilepsy				0.082225	0.0131171	3.06018	154
prenatal risks				0.1348	0.00806366	2.26003	154
febrile seizures				0.30952	0.000255255	1.03957	154
trauma				0.397377	-0.00180805	0.720258	154
inflammation				0.683388	-0.00540344	0.166968	154
age at first seizure				<0.001	0.178045		154
infantile spasms		26(13,39)	25.6085(15,36)	<0.001	0.121231	22.3831	154
epileptic syndrome				0.0881189	0.0185904	2.46804	153
seizure frequency				0.014402	0.048448	3.6306	152
status epilepticus		15(5,25)	14.8397(4,26)	0.0097242	0.0363966	6.85456	154
FBTCS				0.428363	-0.00238903	0.630583	154
abnormal neurological finding		17(9,25)	16.6266(10,23)	<0.001	0.118958	21.928	154
MRI finding				0.902952	-0.00639602	0.0149168	154
age at surgery				0.0185642	0.0354604		154
duration of epilepsy at surgery				0.0247094	0.0323263		154
surgery type				<0.001	0.108655	5.72363	151
surgery extent				<0.001	0.117839	7.90162	152
surgery localization				0.501778	-0.00398076	0.692714	153
complete resection		-14(-21,-6)	-13.2652(-21,-6)	0.000993339	0.0621303	11.2682	154
histopathology				<0.001	0.242697	7.12908	145
FCD class				0.00104151	0.177065	4.57169	78
early post-operative seizures				0.122014	0.00912379	2.418	153
complication type				0.420604	-0.0189821	0.683315	16
FCD1				0.00778879	0.0720353	7.44306	82
FCD2A				0.746751	-0.0109008	0.104986	82
FCD2B				0.592111	-0.00863631	0.289324	82
FCD3A				0.621136	-0.00916594	0.246137	82
FCD3B				<0.001	0.178292	19.0091	82
unspecified MCD				0.225836	0.00585962	1.48921	82
epoch				0.653953	-0.00517673	0.201739	154
1 year follow-up period				0.0345524	0.0368797	2.95289	150
age class12		-6(-12,0)	-7.54612(-14,-1)	0.0274575	0.0248852	4.95564	154
age class6		-7(-16,0)	-8.67487(-16,-2)	0.0244016	0.0261806	5.16708	154

## Sheet: postsurgical IQ before 2011
Determinants of post-surgical IQ/DQ (before 2011)
variable name		median difference	mean difference	p-value	effect size	Fstat	df
sex				0.115159	0.022943	2.54979	65
family history of epilepsy		15(-1,31)	16.4123(3,30)	0.0241678	0.0615497	5.32871	65
prenatal risks				0.827554	-0.0146379	0.0478383	65
febrile seizures				0.113508	0.0232872	2.5736	65
trauma				0.741433	-0.0136722	0.109804	65
inflammation				0.554938	-0.00991265	0.352186	65
age at first seizure				<0.001	0.299272		65
infantile spasms		30.5(9,50)	30.3258(12,48)	0.00176316	0.12747	10.6421	65
epileptic syndrome				0.111599	0.037051	2.26973	64
seizure frequency				0.0913109	0.0537058	2.24858	63
status epilepticus		24.5(9,40)	24.9407(10,39)	0.00148502	0.131733	11.0135	65
FBTCS				0.888914	-0.0150775	0.0196638	65
abnormal neurological finding				0.0587232	0.0393311	3.70213	65
MRI finding				0.83305	-0.0146854	0.0447917	65
age at surgery				0.00992483	0.0979317		65
duration of epilepsy at surgery				0.190173	0.0262569		65
surgery type				0.0267469	0.105855	2.95339	62
surgery extent				0.0118124	0.118813	3.96633	63
surgery localization				0.721808	-0.0207976	0.327662	64
complete resection		-14(-25,-3)	-13.4682(-25,-2)	0.023859	0.0618741	5.35303	65
histopathology				0.0440684	0.107313	2.32235	60
FCD class				0.066825	0.120683	2.40678	37
early post-operative seizures				0.24334	0.00591256	1.3866	64
complication type				0.0367675	0.369094	6.2652	8
FCD1				0.83291	-0.0238458	0.0450936	40
FCD2A				NaN	0	NaN	41
FCD2B				0.0688593	0.0573789	3.49574	40
FCD3A				0.647632	-0.019594	0.212085	40
FCD3B				0.00436299	0.165542	9.1337	40
unspecified MCD				0.394947	-0.00639435	0.739497	40
epoch				NaN	0	NaN	66
1 year follow-up period				0.449481	-0.0059709	0.810065	62
age class12				0.10222	0.0257956	2.74759	65
age class6		-14(-29,-2)	-15.3032(-27,-3)	0.0161801	0.0716872	6.09672	65

## Sheet: postsurgical IQ after 2011
Determinants of post-surgical IQ/DQ (after 2011)
variable name		median difference	mean difference	p-value	effect size	Fstat	df
sex				0.35318	-0.00146467	0.871298	87
family history of epilepsy				0.770544	-0.0105	0.0856002	87
prenatal risks				0.0707297	0.0259837	3.34757	87
febrile seizures				0.701557	-0.00977846	0.147829	87
trauma				0.278579	0.00214106	1.18882	87
inflammation				0.999263	-0.0114942	8.58e-07	87
age at first seizure				0.00190971	0.105394		87
infantile spasms		25(6,43)	23.5582(11,36)	0.000713783	0.113935	12.3156	87
epileptic syndrome				0.497373	-0.00677012	0.704118	86
seizure frequency				0.0430984	0.0587915	2.83227	85
status epilepticus				0.671367	-0.00939156	0.181233	87
FBTCS				0.210874	0.00664593	1.58875	87
abnormal neurological finding		25(15,35)	24.597(15,34)	<0.001	0.209705	24.3508	87
MRI finding				0.778635	-0.0105707	0.0795082	87
age at surgery				0.354632	0.00985625		87
duration of epilepsy at surgery				0.0777645	0.0353252		87
surgery type				0.0308113	0.0757576	2.80328	84
surgery extent				0.0146501	0.0845358	3.7087	85
surgery localization				0.599411	-0.0111487	0.514867	86
complete resection		-14(-24,-3)	-12.9671(-23,-3)	0.0198611	0.0499819	5.62982	87
histopathology				<0.001	0.302083	5.65298	78
FCD class				<0.001	0.407119	6.63077	36
early post-operative seizures				0.265959	0.00287286	1.25354	87
complication type				0.0248054	0.528587	8.84898	6
FCD1				<0.001	0.323796	20.6326	40
FCD2A				0.798056	-0.0233027	0.0663448	40
FCD2B				0.163481	0.024162	2.01517	40
FCD3A				0.828199	-0.0237788	0.0477147	40
FCD3B				0.00398043	0.169051	9.34115	40
unspecified MCD				0.402097	-0.00694506	0.717217	40
epoch				NaN	0	NaN	88
1 year follow-up period				0.0228081	0.0741255	3.34843	85
age class12				0.126521	0.0154405	2.38008	87
age class6				0.288632	0.00158699	1.13988	87
